# Supplementary material for: Constitutive Interferon Maintains GBP Expression Required for Release of Bacterial Components Upstream of Pyroptosis and Anti-DNA Responses
Source: PubMed Central journal article supplement — Cell Rep. Author manuscript; Available in PMC 2018 Jul 27. (PMC6063733; doi:10.1016/j.celrep.2018.06.012), 2018-07-03
Supplement: NIHMS981690-supplement-2.pdf [file NIHMS981690-supplement-2.pdf]

## Constitutive Interferon Maintains GBP Expression Required for Release of Bacterial Components Upstream of Pyroptosis and Anti-DNA Responses

### Graphical Abstract

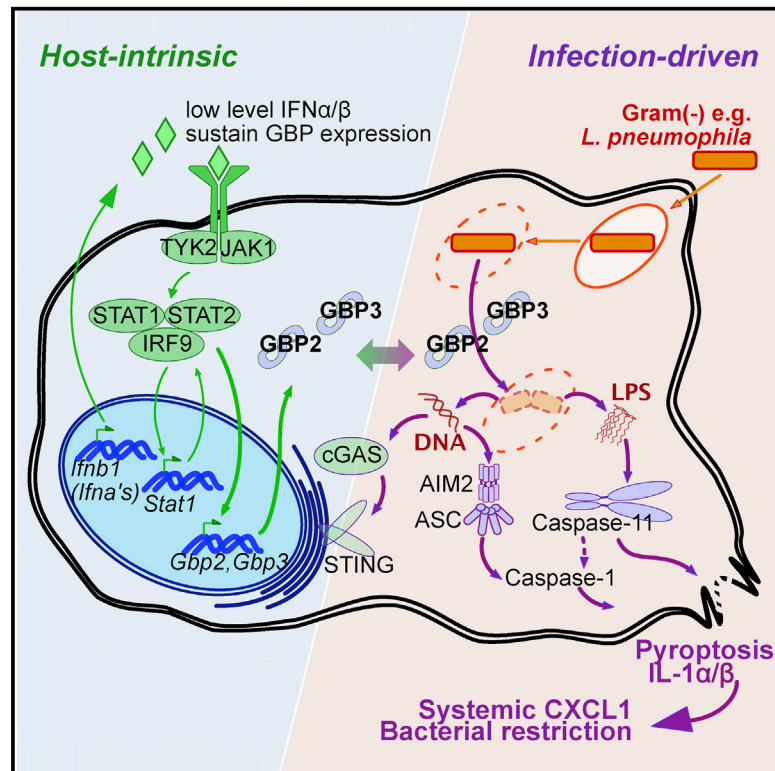

### Authors

Beiyun C. Liu, Joseph Sarhan, Alexander Panda, ..., Masahiro Yamamoto, Ralph R. Isberg, Alexander Poltorak

### Correspondence

ralph.isberg@tufts.edu (R.R.I.), alexander.poltorak@tufts.edu (A.P.)

### In Brief

Guanylate-binding proteins act upstream of many cytosolic pathogen sensors. It is assumed that infection-associated IFN signaling precedes GBP induction. Liu et al. find that host-intrinsic IFN signaling maintains GBPs in naive macrophages to mediate the disruption of cytosol-accessible bacteria. The findings elucidate a crucial role of tonic cytokines in maintaining immune readiness.

### Highlights

- Infection-driven IFN is dispensable for pyroptosis against cytosolic *Legionella*
- Constitutive IFN maintains GBP expression in murine and human macrophages
- GBPs are needed to release bacterial content from cytosolic *Legionella* bacteria
- GBPs are required for restriction of *Legionella* bacterial growth *in vivo*

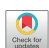

# Constitutive Interferon Maintains GBP Expression Required for Release of Bacterial Components Upstream of Pyroptosis and Anti-DNA Responses

Beiyun C. Liu,<sup>1</sup> Joseph Sarhan,<sup>1,2</sup> Alexander Panda,<sup>3</sup> Hayley I. Muendlein,<sup>4</sup> Vladimir Ilyukha,<sup>5</sup> Jörn Coers,<sup>6</sup> Masahiro Yamamoto,<sup>7</sup> Ralph R. Isberg,<sup>8,9,\*</sup> and Alexander Poltorak<sup>5,10,11,\*</sup>

<sup>1</sup>Graduate Program in Immunology, Tufts University Sackler School of Biomedical Sciences, Boston, MA 02111, USA

<sup>2</sup>MSTP, Tufts University School of Medicine, Boston, MA 02111, USA

<sup>3</sup>Jean Mayer USDA HNRCA, Boston, MA 02111, USA

<sup>4</sup>Graduate Program in Genetics, Tufts University Sackler School of Biomedical Sciences, Boston, MA 02111, USA

<sup>5</sup>Petrozavodsk State University, Republic of Karelia, Russian Federation

<sup>6</sup>Department of Molecular Genetics and Microbiology, and Immunology, Duke University Medical Center, Durham, NC 27710, USA

<sup>7</sup>Department of Immunoparasitology, Research Institute for Microbial Diseases, WPI Immunology Frontier Research Center, Osaka University, Osaka 565-0871, Japan

<sup>8</sup>Howard Hughes Medical Institute, Boston MA, USA

<sup>9</sup>Department of Molecular Biology & Microbiology, Tufts University School of Medicine, Boston, MA 02111, USA

<sup>10</sup>Department of Immunology, Tufts University School of Medicine, Boston, MA 02111, USA

<sup>11</sup>Lead Contact

\*Correspondence: [ralph.isberg@tufts.edu](mailto:ralph.isberg@tufts.edu) (R.R.I.), [alexander.poltorak@tufts.edu](mailto:alexander.poltorak@tufts.edu) (A.P.)

<https://doi.org/10.1016/j.celrep.2018.06.012>

## SUMMARY

*Legionella pneumophila* elicits caspase-11-driven macrophage pyroptosis through guanylate-binding proteins (GBPs) encoded on chromosome 3. It has been proposed that microbe-driven IFN upregulates GBPs to facilitate pathogen vacuole rupture and bacteriolysis preceding caspase-11 activation. We show here that macrophage death occurred independently of microbial-induced IFN signaling and that GBPs are dispensable for pathogen vacuole rupture. Instead, the host-intrinsic IFN status sustained sufficient GBP expression levels to drive caspase-1 and caspase-11 activation in response to cytosol-exposed bacteria. In addition, endogenous GBP levels were sufficient for the release of DNA from cytosol-exposed bacteria, preceding the cyclic GMP-AMP synthase/stimulator of interferon genes (cGAS/STING) pathway for *Ifnb* induction. Mice deficient for chromosome 3 GBPs were unable to mount a rapid IL-1/chemokine (C-X-C motif) ligand 1 (CXCL1) response during *Legionella*-induced pneumonia, with defective bacterial clearance. Our results show that rapid GBP activity is controlled by host-intrinsic cytokine signaling and that GBP activities precede immune amplification responses, including IFN induction, inflammasome activation, and cell death.

## INTRODUCTION

Cytosolic presence of bacterial lipopolysaccharide (LPS) activates caspase-11, resulting in a lytic form of macrophage death

known as pyroptosis (Kayagaki et al., 2011; Meunier and Broz, 2015; Yang et al., 2015). Vacuolar pathogens such as *S. typhimurium* and *L. pneumophila* predominantly bypass caspase-11 activation by maintaining pathogen replication vacuoles that protect the bacterium from cytosolic sensing (Isberg et al., 2009; LaRock et al., 2015). However, interferon (IFN)-activated macrophages can mount a caspase-11 response to vacuole-resident bacteria (Broz et al., 2012; Case et al., 2013) in a process dependent on guanylate-binding proteins (GBPs), a family of IFN-dependent immune guanosine triphosphatases (GTPases) (Meunier et al., 2014; Pilla et al., 2014). The mechanistic steps in which GBPs function remain controversial.

GBP proteins are undetectable by standard immunoblot probing procedures at a cellular resting state but are highly upregulated by IFN $\gamma$  and, to a lesser extent, IFN $\alpha/\beta$  (Kim et al., 2011; Yamamoto et al., 2012). In IFN-activated macrophages, several GBPs localize to pathogen-containing vacuoles (Kim et al., 2011; Meunier et al., 2014; Yamamoto et al., 2012) and have been functionally associated with pathogen vacuole rupture, bacterial killing, or both (Meunier et al., 2014, 2015; Man et al., 2016). In addition, induction of an IFN response during infection (Broz et al., 2012; Meunier et al., 2014; Man et al., 2015) has resulted in a model postulating that infection-driven IFN signaling is required for GBP synthesis and function (Meunier and Broz, 2015).

During *L. pneumophila* challenge, bacterial DNA/RNA trigger cytosolic sensors to induce *Ifnb* transcription within 4–6 hr of infection (Monroe et al., 2009; Lippmann et al., 2011), although secreted IFN $\beta$  protein is not detected until 20 hr post-infection (Coers et al., 2007). The disconnect between *Ifnb* gene transcription and protein accumulation is presumably due to inhibition of host cell protein translation during *Legionella* infection (Fontana et al., 2011; Ivanov and Roy, 2013; Asrat et al., 2014). In line with these findings, caspase-11 activation in response to vacuolar-resident *L. pneumophila* requires IFN priming. The need for IFN

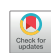

priming can be bypassed by a *L. pneumophila* mutant lacking the SdhA protein ( $\Delta$ *sdhA*) (Monroe et al., 2009; Aachoui et al., 2013). This mutant strain forms an unstable vacuole that exposes the bacterium to the host cytosol (Laguna et al., 2006; Creasey and Isberg, 2012). Despite the cytosolic exposure of the bacterium, caspase-11 activation remains dependent on GBPs encoded on chromosome 3 (Pilla et al., 2014). The differential requirement of IFN priming for pyroptosis when challenged with vacuole-stable or cytosol-accessible bacteria calls for a re-evaluation of the function of GBPs upstream of caspase-11.

In this work, we investigated the initiation of antimicrobial responses toward a cytosolic bacterium. We found that GBPs are not involved in pathogen vacuole disruption and that cytosol-exposed *L. pneumophila* drove macrophage pyroptosis in the absence of microbial-induced IFN signaling. Constitutive IFN signaling maintains GBP expression at steady-state levels that are low but sufficient for function upstream of caspase-11 and caspase-1. We also found that chromosome 3 GBPs are required for the release of bacterial DNA, preceding the cyclic GMP-AMP synthase/stimulator of IFN genes (cGAS/STING) induction of IFN. During *Legionella*-induced pneumonia, chromosome 3 (chr3) GBPs are required for the interleukin (IL)-1/chemokine (C-X-C motif) ligand 1 (CXCL1) response for timely bacterial clearance.

## RESULTS

### Infection-Driven IFN Signaling Is Dispensable for Pyroptosis

All *L. pneumophila* strains used in the present study are deficient for flagellin (*flaA*) to bypass the Naip5/NLRC4/caspase-1 cell death pathway that occurs on the C57BL/6 genetic background (Ren et al., 2006). *L. pneumophila* deficient for the SdhA protein ( $\Delta$ *sdhA*) becomes cytosolic exposed (Laguna et al., 2006; Creasey and Isberg, 2012) and drives macrophage pyroptosis (Aachoui et al., 2013). Maximal caspase-11-mediated macrophage pyroptosis toward the *L. pneumophila*  $\Delta$ *sdhA* strain was observed by 6 hr post-infection (Figure 1A). Using *L. pneumophila*-GFP<sup>+</sup> to distinguish infected and bystander cells, we confirmed that cell death occurred in the subpopulation that harbored bacteria (Figures S1A and S1B). To rule out the contribution of necroptosis, another form of necrotic cell death (Wallach et al., 2016), we used Necrostatin-1 (Nec1) to inhibit RIP1/RIP3 activity, which did not affect cell death (Figure S1C).

*L. pneumophila* infection of macrophages results in robust *lfnb* transcription via cytosolic DNA- and RNA-sensing pathways STING and RIG-I/MDA5, respectively (Monroe et al., 2009; Lippmann et al., 2011). Because *Legionella* translocates effectors that selectively block host cell protein translation, it is unclear whether type I IFNs bypass the *L. pneumophila*-elicited translational block (Fontana et al., 2011; Ivanov and Roy, 2013; Asrat et al., 2014). Transcriptional induction of *lfnb* in response to the *L. pneumophila*  $\Delta$ *sdhA* mutant was similar in magnitude to that of LPS (Figure S1D). However, we did not detect secretion of IFN $\beta$  protein from *Legionella*-infected cells, in contrast to cells stimulated with LPS, cytosolic cyclic [G(2',5')pA(3',5')p] (cGAMP), and cytosolic polyinosine-polycytidylic acid (polyI:C) (Figure 1B; Figure S1D). To determine whether infected macro-

phage populations were experiencing IFN signaling, we probed for STAT1 phosphorylation downstream of IFN- $\alpha/\beta$  receptor (IFNAR). We were unable to detect increased STAT1 phosphorylation within 6 hr of *L. pneumophila* infection, in contrast to that observed in the presence of LPS, cGAMP, and polyI:C (Figures 1C and 1D). To dismiss the possibility of missed STAT1 phosphorylation in dying cells, STAT1 phosphorylation was measured in *Casp11*<sup>-/-</sup> cells or B6 cells treated with pan-caspase inhibitor zVAD (Figure 1D). No increase in STAT1 phosphorylation were detected under these conditions (Figure 1D).

IFN feedback is proposed to drive *de novo* synthesis of GBPs and pro-caspase-11, so we investigated whether these proteins were produced before cell death. We were unable to detect accumulation of GBP2 by 4 and 6 hr post-infection (Figure 1E), although we did see clear accumulation of GBP2 protein in response to the avirulent *L. pneumophila* *dotA*<sup>-</sup> mutant by 10 hr post-infection, consistent with its inability to block protein synthesis (Figure S1E) (Ivanov and Roy, 2013). We observed an increase of pro-caspase-11 within 6 hr of infection (Figure 1E). To determine whether pro-caspase-11 was synthesized by infected or bystander cell populations, macrophages challenged with *L. pneumophila*-GFP strains were sorted to separate infected GFP<sup>+</sup> cells from bystander GFP<sup>-</sup> cells. Pro-caspase-11 accumulated in the GFP<sup>-</sup> bystander population, but not in the GFP<sup>+</sup>-infected population (Figure 1F). The lack of GBP2 and pro-caspase-11 accumulation in infected cells suggest that low protein abundance present in resting macrophages is sufficient for pyroptosis.

To determine whether IFN signaling concurrent with infection stimulates pyroptotic death, cells were incubated with 100 IU/mL of recombinant IFN $\beta$  at various times leading up to bacterial challenge and cell death was monitored (Figures 1G–1I). We found that despite robust IFNAR signaling in response to exogenous IFN $\beta$  (Figure 1H), IFN $\beta$  stimulation simultaneous with, or 1 hr before, infection had no effect on cell death induced by either the  $\Delta$ *sdhA* mutant (Figure 1I, left) or wild-type (WT) (Figure S1F). IFN $\beta$  pre-treatment at least 4 hr before infection was needed to significantly increase the rate of cell death, as demonstrated by a reduction in the time to 50% of maximal cell death (Figure 1I, middle). Extensive IFN treatment did not significantly increase the maximal cell death in response to the  $\Delta$ *sdhA* mutant (Figure 1I, right). In contrast, cell death toward the WT strain required 4 hr of IFN pre-treatment (Figure S1F). In both cases, at least 4 hr of pre-activation with IFN $\beta$  was necessary to enhance cell death, indicating that cell death depends on pre-established IFN status.

### Constitutive IFNAR Signaling Controls Macrophage Cell Death Rate

Sub-threshold amounts of IFN $\alpha/\beta$  are thought to maintain expression of a set of IFN-stimulated genes (ISGs) required for cellular responses against infection (Gough et al., 2012). To determine the impact of constitutive IFN signaling on caspase-11 activation, we treated macrophages with an IFN receptor (IFNAR)-blocking antibody (clone MAR1-5A3) for various lengths of time (Figures 2A–2D). Blocking IFNAR 1 hr before infection did not affect cell death kinetics toward the  $\Delta$ *sdhA* mutant (Figures 2C and 2D), despite efficient block of STAT1 phosphorylation

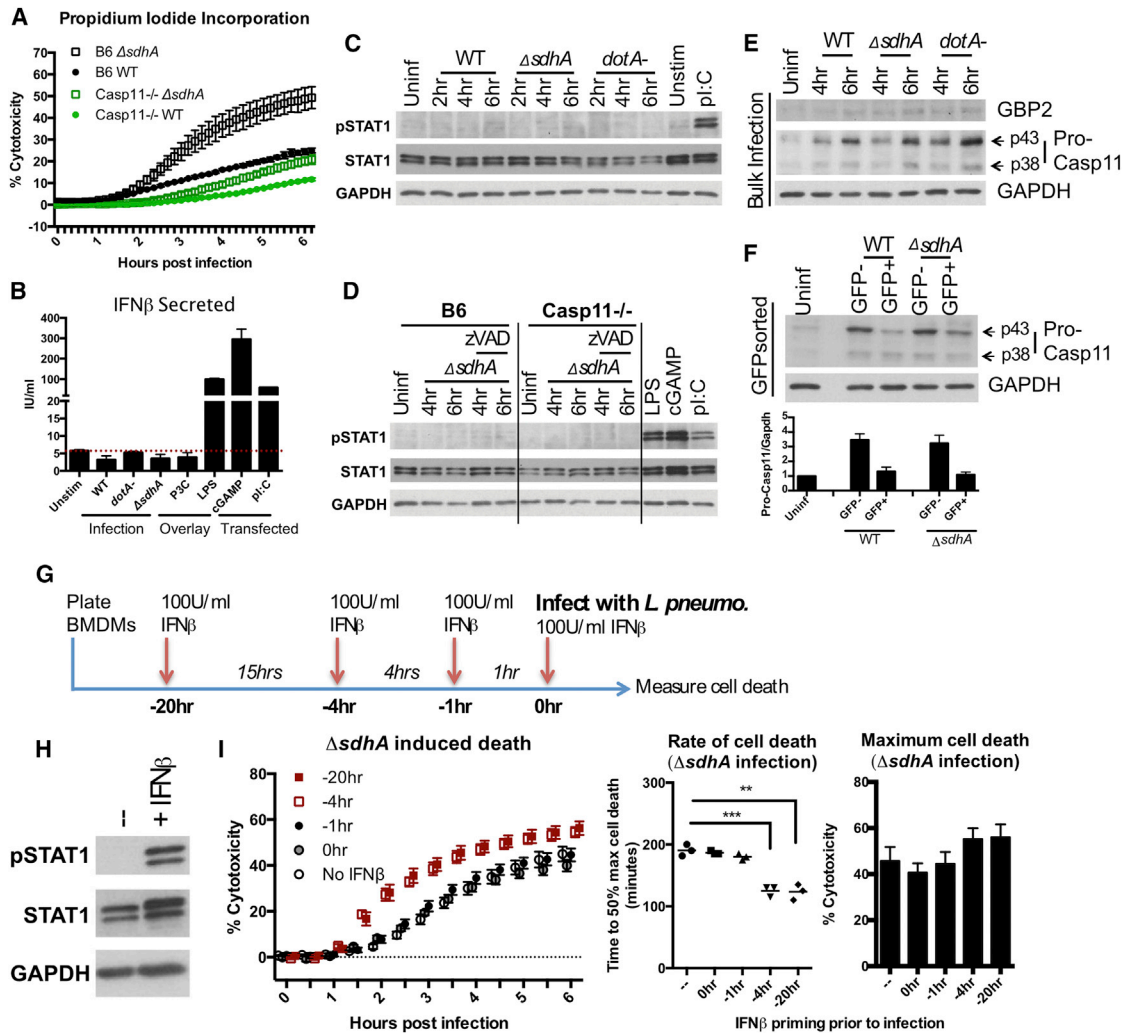

**Figure 1. Infection-Driven IFN Signaling Is Dispensable for Pyroptosis**

(A) Macrophages were infected with *L. pneumophila* WT and  $\Delta sdhA$  strains. Propidium iodide (PI) incorporation was used to monitor death. (B) B6 macrophages were infected with WT,  $dotA^{-}$ , or  $\Delta sdhA$  strains or stimulated by agonists: P3C (Pam3Cysk4), LPS, cGAMP (transfected), or poly:I:C (transfected). At 8 hr, supernatants were collected and measured by ELISA for IFN $\beta$  protein. (C) B6 macrophages were challenged with WT,  $dotA^{-}$ , or  $\Delta sdhA$  strains. Whole-cell lysates were used for immunoblot. 2-hr challenge with poly:I:C (overlay) as control. (D) Macrophages were challenged with the  $\Delta sdhA$  mutant in the absence or presence of zVAD (pan-caspase inhibitor). Whole-cell lysates were used for immunoblot. 6-hr transfection with poly:I:C and cGAMP as controls. (E) B6 macrophages were challenged with WT,  $dotA^{-}$ , or  $\Delta sdhA$  strains. Whole-cell lysates were used for immunoblot. (F) Macrophages challenged for 6 hr with WT or  $\Delta sdhA$  strains were fluorescence-activated cell sorted into GFP $^{+}$  (infected) and GFP $^{-}$  (bystander) populations and lysed for immunoblotting. The blot shows one representative experiment. The bar graph is quantified from n = 3 experiments, normalized to pro-caspase-11 levels in unstimulated macrophages. (G) Timeline that applies to (H) and (I) and Figure S1F. B6 macrophages were pre-treated with 100 IU/mL of IFN $\beta$  before or during challenge by *L. pneumophila*  $\Delta sdhA$ . (H) Immunoblot of whole-cell lysates from BMDMs that were unstimulated IFN $\beta$  or 1 hr of IFN $\beta$  stimulation. (I) PI incorporation as a function of time after challenge of B6 macrophages by *L. pneumophila*  $\Delta sdhA$  treated with IFN $\beta$  at various times (left). The rate of cell death is displayed as time to 50% of maximal cell death (middle). Maximum cell death was measured at 6 hr post infection (hpi) (right). See Figure S1.

in response to exogenous IFN $\beta$  (Figure 2B). However, 20-hr blockade of IFNAR before infection reduced cell death in response to the  $\Delta sdhA$  mutant (Figures 2C and 2D). Macrophages from mice lacking type I IFN receptor (*Ifnar* $^{-/-}$ ) also ex-

hibited defective cell death, characterized by delayed onset with a significant increase in time to 50% maximal cell death (Figures 2E and 2F). Prolonged inhibition of IFNAR signaling did not alter cell death in *Casp11* $^{-/-}$  macrophages, indicating that cell

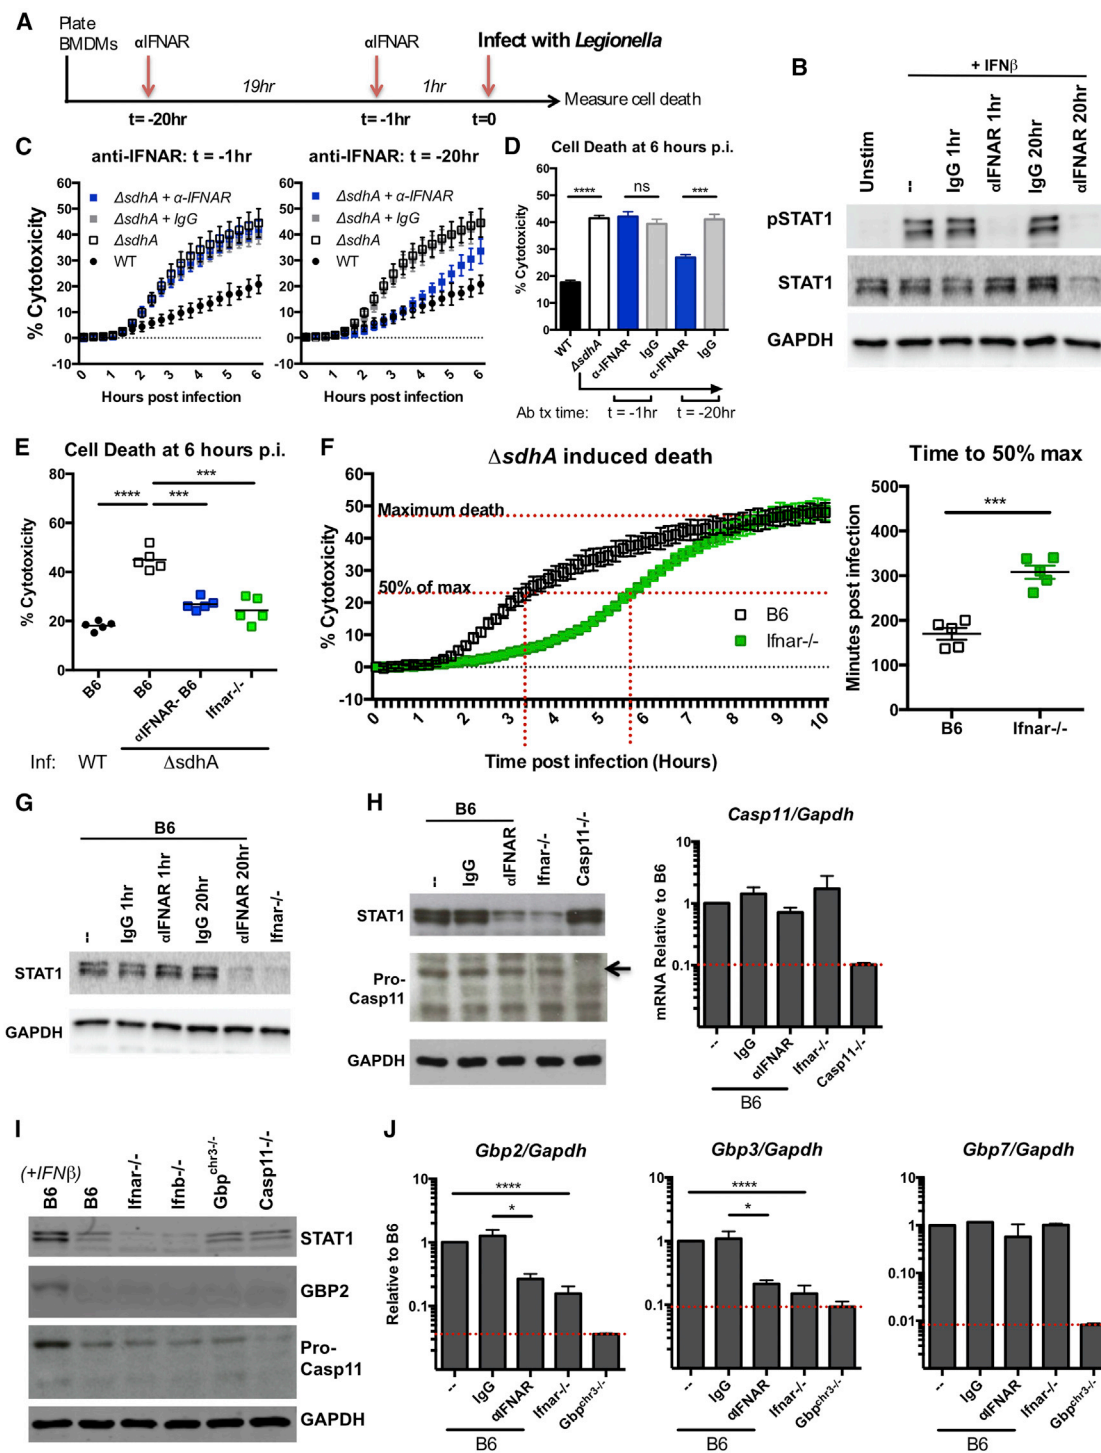

**Figure 2. Constitutive IFNAR Signaling Controls Macrophage Cell Death Rate**

(A–D) IFN receptor blocking antibody ( $\alpha$ IFNAR) or immunoglobulin G (IgG) control were added before or during bacterial challenge.

(A) Antibody block and infection setup.

(B) Immunoblot of macrophages in response to 1 hr of treatment with 100 IU/mL of exogenous IFN, in the presence of antibodies for 1 or 20 hr before IFN $\beta$  addition.

(C) *L. pneumophila*  $\Delta$ sdhA infection-driven PI incorporation of macrophages that were treated with control IgG or  $\alpha$ IFNAR antibody for 1 or 20 hr before infection.

(D) PI uptake by 6 hpi; n = 3.

(legend continued on next page)

death in the absence of IFN signaling remained caspase-11 dependent (Figure S2A).

We next determined whether loss of constitutive IFN signaling perturbed basal levels of proteins in the caspase-11 pathway. STAT1 is an ISG whose protein abundance is sustained via constitutive IFNAR signaling (Gough et al., 2010, 2012). 20-hr IFNAR block reduced total STAT1 protein levels (Figure 2G), as well as mRNA expression for several ISGs, such as *Irf7*, *Isg15*, and *Mx1* (Figure S2B). We did not observe a reduction in baseline expression of pro-caspase-11 protein or *Casp11* mRNA under conditions in which constitutive IFN signaling is lost (Figures 2H and 2I). Looking upstream at GBP expression, consistent with published literature, we were unable to detect GBP2 protein in B6 macrophages in the absence of IFN priming (Figure 2I). Of the 5 *Gbps* encoded on the chr3 locus, only *Gbp2*, *Gbp3*, and *Gbp7* were expressed in macrophages in the absence of priming (Figure S2C), with expression of *Gbp2* and *Gbp3* reduced in *Ifnar*<sup>-/-</sup> and *Ifnb*<sup>-/-</sup> macrophages (Figure 2J; Figure S2C). Expression of *Gbp2* and *Gbp3* was also significantly reduced by blocking constitutive IFNAR signaling (Figure 2J). Not all GBPs required constitutive IFNAR signaling for basal expression, such as *Gbp7* on chr3, as well as *Gbps* encoded on the chromosome 5 locus (Figure 2J; Figure S2D).

### Endogenous GBP Expression and Rate of Cell Death Are Controlled by a Narrow Window of Low-Dose IFN Signaling

Pyroptosis of *Ifnb*<sup>-/-</sup> macrophages exhibited delayed onset after challenge with *L. pneumophila*  $\Delta$ *sdhA* compared to B6, consistent with reduced *Gbp2* and *Gbp3* expression (Figure 3A). To determine the amount of IFN needed to rescue this defect, *Ifnb*<sup>-/-</sup> bone marrow derived macrophages (BMDMs) were treated with increasing amounts of IFN $\beta$  20 hr before challenge with bacteria (Figure 3B).  $\Delta$ *sdhA* mutant-induced cell death was restored with an IFN $\beta$  dose of 0.5 IU/mL (Figure 3B). 0.5 or 1 IU/mL of IFN $\beta$  restored expression of STAT1 (Figure 3C), *Gbp2*, and *Gbp3* (Figure 3D), as well as several other ISGs (*Isg15*, *Mx1*, and *Irf7*) (Figure S3) to levels observed in B6 macrophages at steady state.

We found that 4 IU/mL of IFN $\beta$  added to *Ifnb*<sup>-/-</sup> macrophages was sufficient to induce a cytotoxic response reminiscent of cells stimulated with 100 IU/mL of IFN $\beta$ , a standard dose used for IFN activation (Figure 3B). This parallels the amount necessary to mimic STAT1 phosphorylation levels in B6 macrophages (Figure 3C). Of particular interest is that for detection of GBP2 protein by immunoblotting, at least 10–50 IU/mL of IFN $\beta$  stimulation was needed (Figures 3E and 3F).

### GBPs Perturb Cytosolic Bacteria after Pathogen Vacuole Disruption

The localization of GBPs around pathogen-containing vacuoles has been associated with bacterial death (Meunier et al., 2014, 2015; Man et al., 2016), although this association has not been demonstrated for restriction of either *L. pneumophila* or *Chlamydia muridarum* (Pilla et al., 2014; Finethy et al., 2015). In addition, there is disagreement on the exact step or steps promoted by GBPs, with earlier studies suggesting a role for GBPs in pathogen vacuole disruption and later studies showing GBPs to function downstream of pre-destroyed vacuoles (Meunier et al., 2014, 2015; Man et al., 2015, 2016). We therefore sought to determine the role of GBPs in the disruption of *Legionella*-containing vacuole (LCV).

The loss of LCV integrity can be assayed by immunofluorescent probing of bacteria in the absence of membrane permeabilization with detergents (Figure 4A) (Creasey and Isberg, 2012). Loss of the  $\Delta$ *sdhA* mutant vacuole integrity was unaltered in *Ifnar*<sup>-/-</sup>, *Gbp*<sup>chr3-/-</sup>, and *Casp11*<sup>-/-</sup> macrophages (Figure 4B). Nevertheless, when challenged with *L. pneumophila*,  $\Delta$ *sdhA* and *Gbp*<sup>chr3-/-</sup> macrophages exhibited delayed and reduced maximal cell death (Figure 4C). Cytosolic *L. pneumophila* assumes an aberrant morphology after breakdown of the LCV, which can be detected as the normally rod-shaped organism assuming a swollen, frayed, or truncated morphology (Figure 4A) (Laguna et al., 2006; Creasey and Isberg, 2012). Within the cytosol-accessible bacterial population, we observed that cytosolic *L. pneumophila* retained their rod shape in *Gbp*<sup>chr3-/-</sup> macrophages up to 10 hr post-infection, indicating that GBP function was required for inflicting damage on cytosolic bacteria (Figures 4D and 4E). In *Ifnar*<sup>-/-</sup> macrophages, cytosolic bacteria retained their rod-shaped morphology at early time points post-vacuole disruption (Figures 4E and 4F) but eventually gained aberrant morphology (Figures 4D, 4E, and 4G).

WT *L. pneumophila* triggered pyroptotic cell death only when macrophages were pre-activated with IFNs (Figures S1F, S4A, and S4B) (Case et al., 2013). This process requires the chr3-encoded GBPs (Pilla et al., 2014). 100 IU/mL of IFN $\beta$  pre-activation rapidly destabilized the vacuoles of WT *L. pneumophila* in macrophages sufficient or deficient for chr3 GBPs (Figure S4C). Morphologically, IFN activation resulted in the loss of rod-shaped appearance in 80%–90% of cytosol-accessible *L. pneumophila* within 3 hr of infection in B6 and *Casp11*<sup>-/-</sup> macrophages. Almost all bacteria within the cytosol-accessible subpopulation retained their rod-shaped morphology in *Gbp*<sup>chr3-/-</sup> macrophages (Figures S4D and S4E). We therefore conclude that IFN pre-activation drives the synthesis of factors other

(E) Cell death of macrophages at 6 hpi with  $\Delta$ *sdhA* mutant, as measured by PI incorporation.  $\alpha$ IFNAR: 20 hr pre-treatment. Triplicate averages from n = 5 shown with each marker representing one experiment.

(F) Left: kinetics of macrophage death with  $\Delta$ *sdhA* infection. Right: average time to 50% maximal death from cells from 5 animals.

(G) Total STAT1 protein in the presence of  $\alpha$ IFNAR blocking antibody or in untreated *Ifnar*<sup>-/-</sup> macrophages were assessed by immunoblotting.

(H) Immunoblot (left) and mRNA (right) of caspase-11 expression in the presence or absence of IFN signaling. Left: the arrow marks the p43 subunit of pro-caspase-11. Caspase-11 antibody also shows a non-specific band at 37 kDa (close to the published p38 subunit). Right: the dotted red line marks background amplification by qPCR from *Casp11*<sup>-/-</sup> macrophages.

(I) Steady-state protein levels determined by immunoblotting of macrophages from various mouse strains. Lysate in lane 1 is from B6 macrophages treated with 100 IU/mL of IFN $\beta$  for 8 hr. Other samples were unstimulated macrophages.

(J) qRT-PCR of indicated genes. The dotted red line marks background amplification by qPCR from *Gbp*<sup>chr3-/-</sup> macrophages.

See Figure S2.

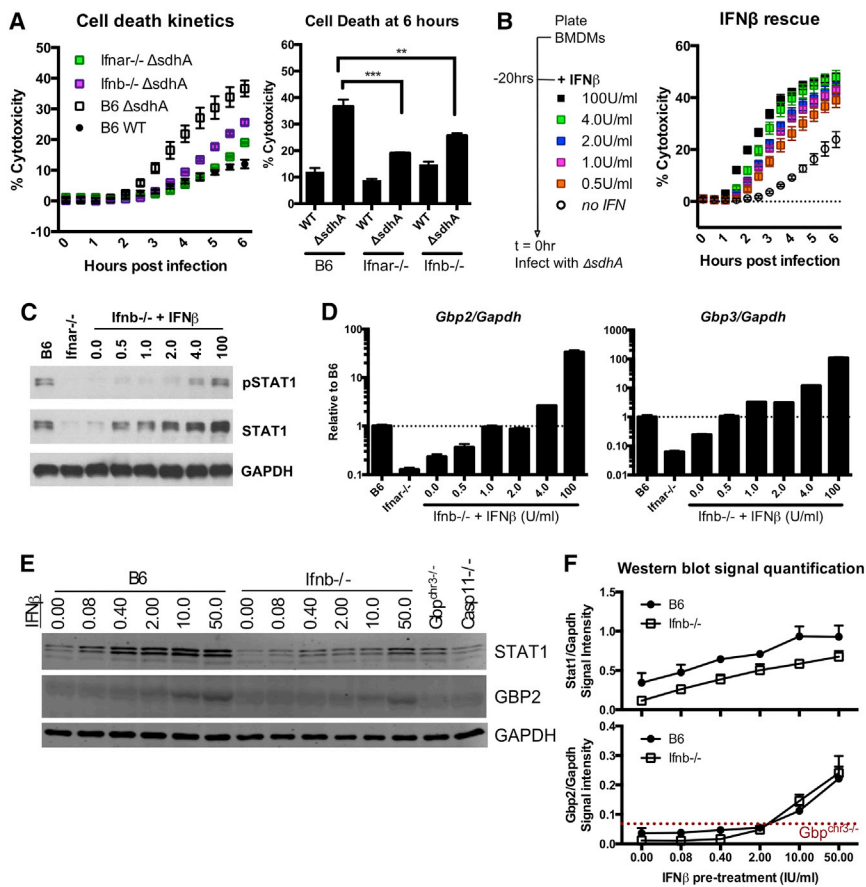

**Figure 3. Endogenous GBP Expression and Rate of Cell Death Are Controlled by a Narrow Window of Low-Dose IFN Signaling**

(A) Macrophages were challenged with *L. pneumophila*  $\Delta sdhA$ , and macrophage death was measured by PI incorporation. Left: representative kinetics of cell death. Right: average cell death at 6 hpi; N = 3.

(B) *Ifnb*<sup>-/-</sup> macrophages were treated for 20 hr with recombinant IFN $\beta$ . Cells were then challenged with *L. pneumophila*  $\Delta sdhA$ , and macrophage death was measured by PI incorporation.

(C and D) Immunoblot (C) and qRT-PCR (D) after 20 hr of treatment of *Ifnb*<sup>-/-</sup> macrophages with low-dose IFN $\beta$ . The dotted black line indicates steady-state expression of genes of interest in B6 macrophages.

(E and F) B6 and *Ifnb*<sup>-/-</sup> BMDMs were stimulated with recombinant IFN $\beta$  for 8 hr. Immunoblot shown in (E). Quantification of band intensity over GAPDH shown in (F). The dotted red line indicates the threshold of antibody detection on the LI-COR Biosciences. Representative of 3 experiments. See Figure S3.

than GBPs that can destabilize an intact bacterial vacuole. While GBPs were dispensable for vacuole disruption under all conditions tested, they were required for the disruption of bacteria exposed to the cytosol, a crucial event upstream of caspase-11 activation and cell death.

### Human Macrophages Require JAK/STAT Signaling for Constitutive Antimicrobial Responses

Caspase-4 and caspase-5 are human orthologs of murine caspase-11 that drive activation-induced cell death in response to intracellular LPS (Shi et al., 2014; Casson et al., 2015). Similar to our observations with mouse macrophages, both human bronchoalveolar lavage (BAL) cells and human peripheral blood monocyte-derived macrophages (MDM) challenged with *L. pneumophila*  $\Delta sdhA$  exhibited cell death in the absence of an IFN priming event (Figures 5A–5D; Figure S5).

We used JAK/STAT inhibitors to block human IFNAR signaling (Zurney et al., 2007; Jackson et al., 2016; Mostafavi et al., 2016). Human MDMs were treated with JAK1/2 inhibitor ruxolitinib (JAKi) for either 40 hr before infection (pre-infection block) or exclusively during infection (co-infection block) (Figure 5E). Treatment of human MDMs with JAKi abolished all IFN $\beta$ -stimulated STAT1 phosphorylation, independent of treatment protocol (Figure 5F). Treatment with JAKi for 40 hr also led to a drastic reduction of Stat1 protein levels (Figure 5F) and *hISG15* and

Examining steps upstream of cell death, we observed loss of vacuole integrity with the *L. pneumophila*  $\Delta sdhA$  mutant (Figure 5J). Long-term Jak1/2 inhibition before infection did not reduce cytosol permeability (Figure 5J). In contrast, within the cytosol-exposed  $\Delta sdhA$  population, long-term Jak1/2 inhibition before infection significantly decreased the percentage of bacteria with aberrant morphology (Figures 5K and 5L). These results point to the global importance of this host-derived constitutive signaling pathway in protecting against cytosolic Gram-negative pathogen.

### GBPs Mediate the Release of DNA to Activate Cytosolic DNA-Sensing Pathways

To examine whether the observed bacterial morphological changes resulted in release of bacterial content into the macrophage cytosol, we probed for the presence of bacterial DNA in the cytosol of the host cell. Using *L. pneumophila* carrying the non-transferable pJB908 plasmid, the presence of pJB908 in the macrophage cytosol provides a measure of DNA released from disrupted bacteria (Ge et al., 2012). We found 2.5–3 times more plasmid in cytosolic extract of B6 macrophages challenged with *L. pneumophila*  $\Delta sdhA$ (pJB908) than with WT infection (Figure 6A), consistent with previous reports (Ge et al., 2012). In contrast, cytosolic extracts from *Ifnar*<sup>-/-</sup> macrophages and *Gbp*<sup>chr3-/-</sup> macrophages infected with the  $\Delta sdhA$  mutant

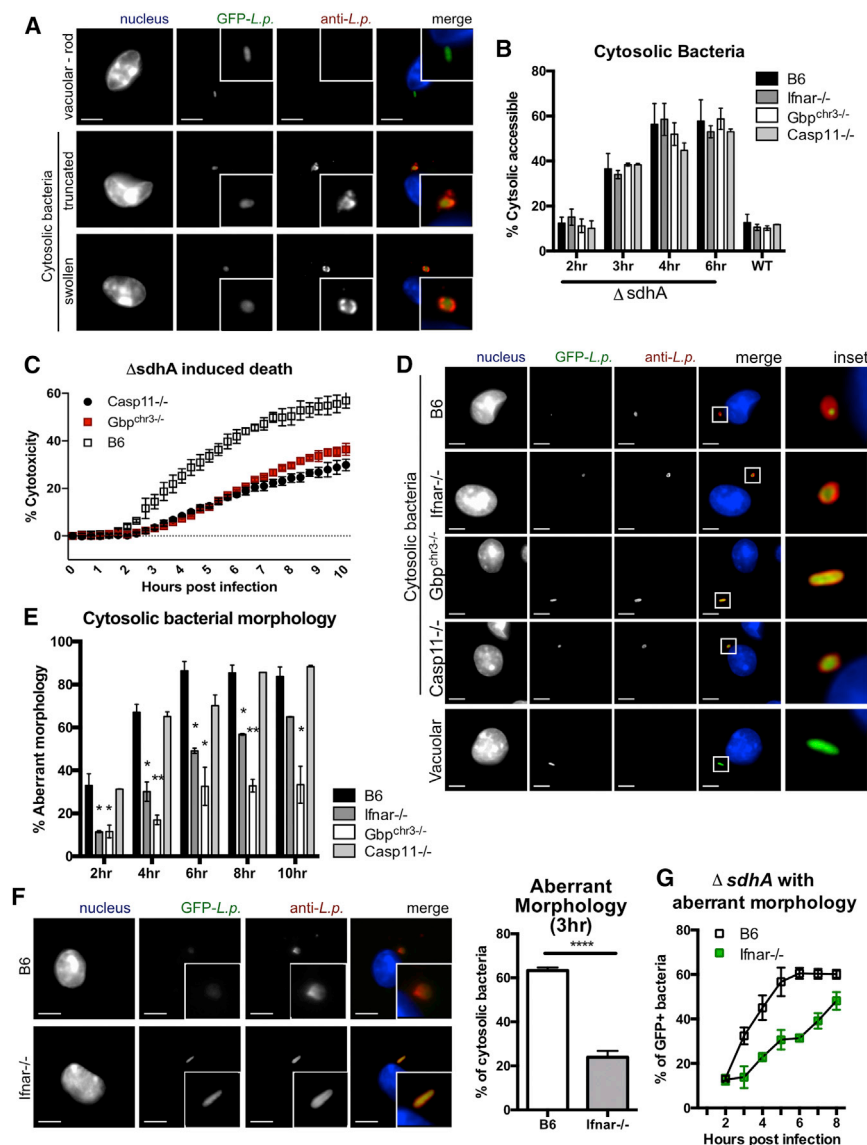

**Figure 4. GBPs Perturb Cytosolic Bacteria after Pathogen Vacuole Disruption**

(A) Representative images of vacuolar and cytosolic bacteria in B6 macrophages to demonstrate various morphologies. 100 $\times$  lens; scale bar, 5  $\mu$ m. (B) At the indicated time points, macrophages challenged with *L. pneumophila*-GFP WT and  $\Delta$ sdhA strains were fixed and stained with an antibody against *Legionella* with no detergent permeabilization. The percentage of antibody-stained bacteria relative to GFP<sup>+</sup> bacteria is plotted as cytosolic bacteria.

(C) Macrophages were challenged with *L. pneumophila*  $\Delta$ sdhA, and macrophage death was measured by PI incorporation representative from n = 3.

(D) Representative images of cytosolic bacteria at 8 hpi. 63 $\times$  lens; scale bar, 5  $\mu$ m.

(E) Percentage of cytosol-exposed bacteria with aberrant morphology. 100+ bacteria were counted per technical replicate.

(F) Left: representative images of cytosolic  $\Delta$ sdhA in macrophages at 3 hpi. Images were taken with 100 $\times$  lens; scale bar, 5  $\mu$ m. Right: percentage of bacteria with aberrant morphology quantified at 3 hpi.

(G) Percentage of cytosol-accessible bacteria with aberrant morphology, quantified by microscopy kinetically. 100+ bacteria were counted per technical replicate.

See Figure S4.

harbored significantly lower amounts of plasmid than did similarly infected B6 macrophages (Figure 6A). During WT *L. pneumophila* challenge, the release of pJB908 plasmid was enhanced by IFN pre-activation in B6 and *Casp11*<sup>-/-</sup> macrophages (Figure 6B). This enrichment was lost in *Gbp*<sup>chr3-/-</sup> macrophages (Figure 6B).

Cytosolic DNA drives cGAS/STING activation and *Ifnb* induction. We assayed *Ifnb* mRNA upregulation and found significantly reduced *Ifnb* induction in *Gbp*<sup>chr3-/-</sup> macrophages in response to *L. pneumophila*  $\Delta$ sdhA (Figure 6C). We found significantly heightened *Ifnb* induction in *Casp11*<sup>-/-</sup> macrophages, consistent with reports that caspase-1/11 activation curtails cGAS/STING activation (Corrales et al., 2016; Wang et al., 2017).

*Casp1*<sup>-/-</sup> *Casp11*<sup>-/-</sup> macrophages had a further reduction in cell death compared to *Casp11*<sup>-/-</sup> macrophages, implicating a role for the canonical caspase-1 inflammasome (Figure 6D).

and caspase-11 (Figure 6F, right), consistent with pyroptosis curtailing ASC oligomerization. We observed no enrichment of ASC specks in *Gbp*<sup>chr3-/-</sup> macrophages in response to *L. pneumophila*  $\Delta$ sdhA challenge compared to WT bacteria (Figures 6E and 6F). Lastly, *L. pneumophila*  $\Delta$ sdhA infection resulted in the cleavage of 31-kDa pro-IL-1 $\beta$  into the 17-kDa mature IL-1 $\beta$  fragment in B6 macrophages. This cleavage event was significantly reduced in *Casp11*<sup>-/-</sup> macrophages and further reduced in *Gbp*<sup>chr3-/-</sup> macrophages (Figure 6G).

### Chr3 GBPs Are Involved in Restriction of *Legionella* Bacterium during Pneumonia

To examine the role of GBPs during *Legionella*-induced pneumonia, B6 and *Gbp*<sup>chr3-/-</sup> mice were infected with *L. pneumophila*  $\Delta$ f1a or *L. pneumophila*  $\Delta$ f1a  $\Delta$ sdhA bacteria. We observed an acute drop in body temperature of B6 mice within



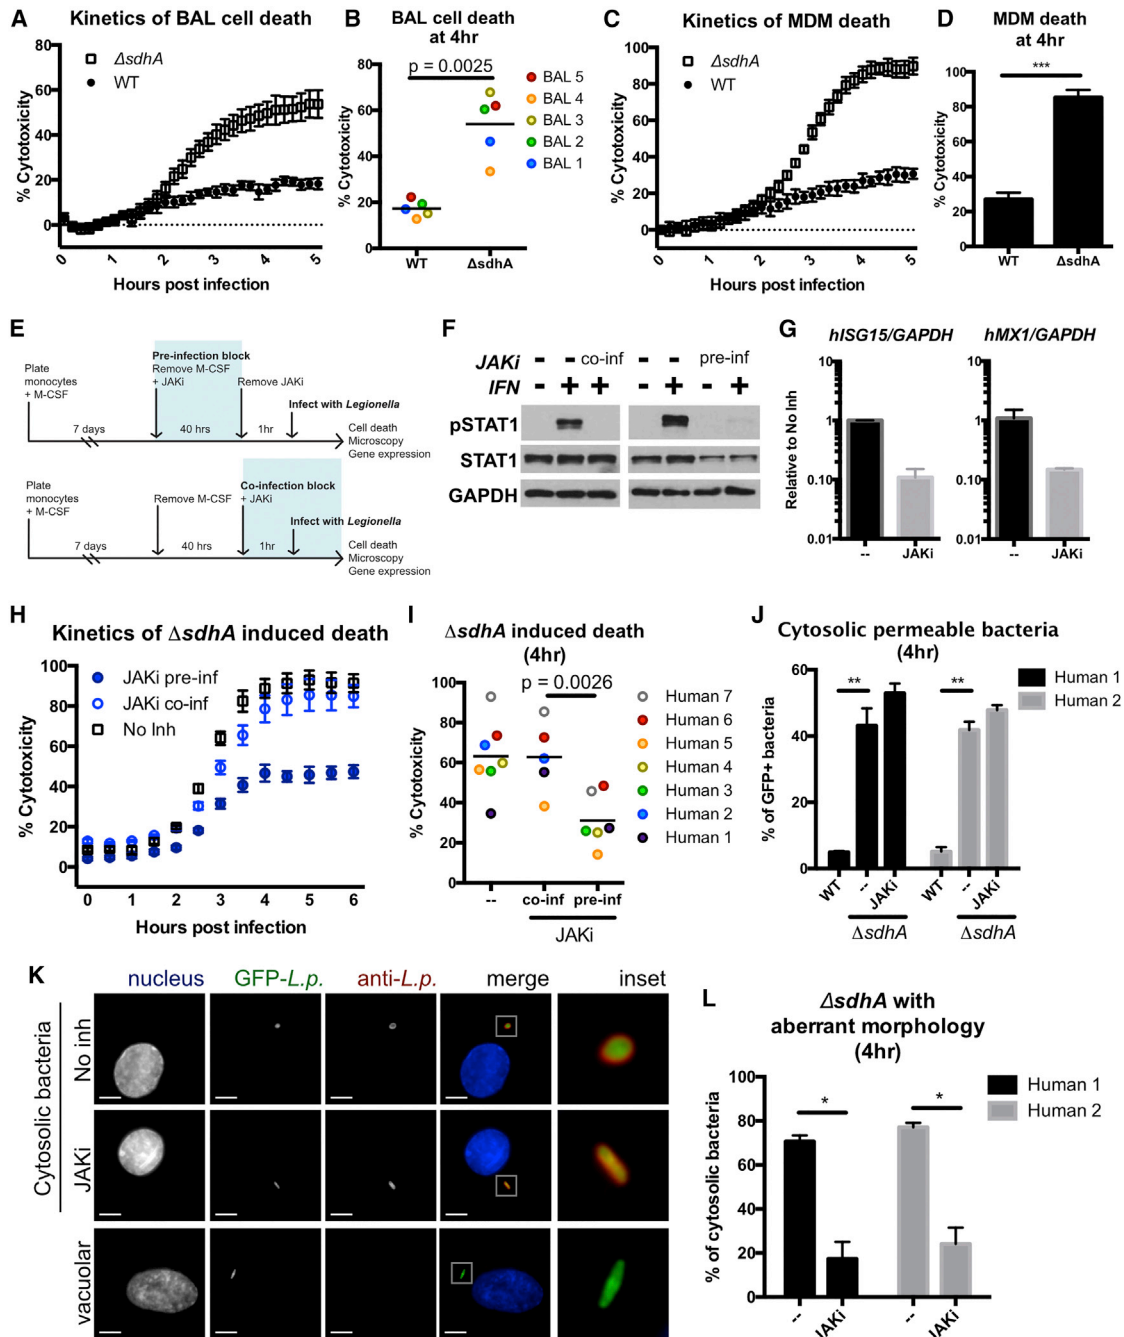

**Figure 5. Human Macrophages Require JAK/STAT Signaling for Constitutive Antimicrobial Responses**

(A and B) Human bronchoalveolar lavage (BAL) cells were challenged with *L. pneumophila* WT or  $\Delta sdhA$  strains. (A) Cell death as a function of time assayed by PI uptake, compiled from 5 donors with mean  $\pm$  SEM plotted. (B) Magnitude of cell death in individual BAL samples by 4 hpi, represented as one marker per donor. (C and D) Human peripheral blood monocyte-derived macrophages (MDM) were challenged with *L. pneumophila* WT or  $\Delta sdhA$  strains with kinetics of PI incorporation in (C) and maximal cell death by 4 hr post-infection (representative of 3 experiments) in (D). (E) Experimental setup for (F)–(I), in which human MDMs were treated with JAK1/2 inhibitor (JAKi) before or during challenge with *L. pneumophila*  $\Delta sdhA$ . (F) 200 IU/mL of recombinant human IFN $\beta$  was used to stimulate human MDMs, incubated for the indicated times with JAKi. 1 hr after IFN stimulation, lysates were collected and probed by immunoblot. (G) Gene expression in human MDMs with or without JAKi for 40 hr. (H and I) PI incorporation of human MDMs infected with *L. pneumophila*  $\Delta sdhA$ , with simultaneous or prolonged JAK inhibition. Representative kinetics of death are in (H). Maximum cytotoxicity from 7 individual donors is in (I).

(legend continued on next page)

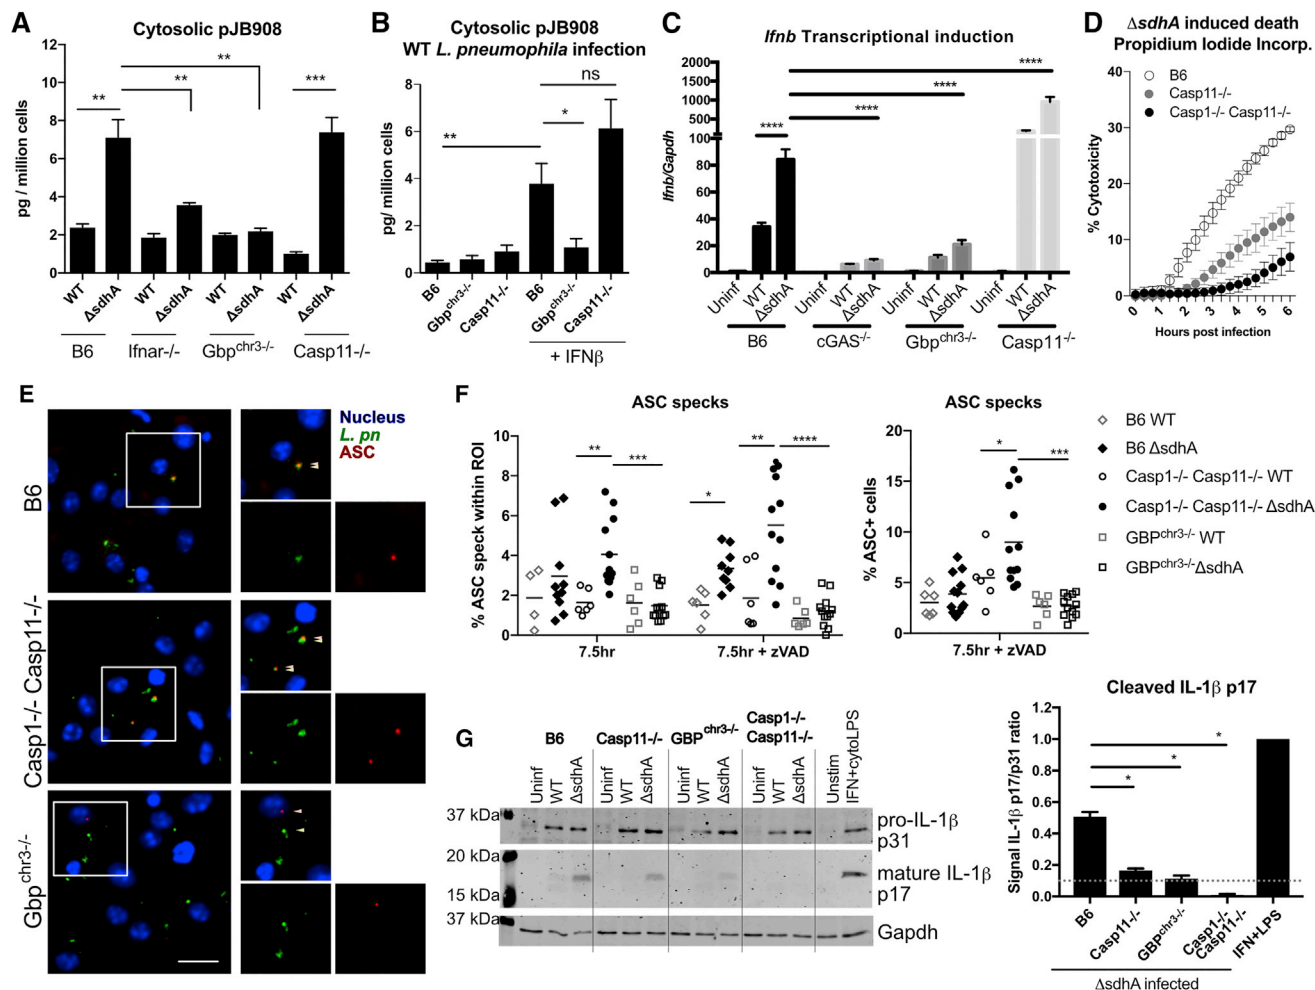

**Figure 6. GBPs Mediate the Release of DNA to Activate Cytosolic DNA-Sensing Pathways**

(A) pJB908 plasmid extracted from cytosolic fractions of macrophages challenged with *L. pneumophila* (pJB908) WT or  $\Delta sdhA$  strains at 6 hpi. (B) pJB908 plasmid extracted from cytosolic fractions of macrophages challenged with WT *L. pneumophila* (pJB908) at 3 hpi in the presence or absence of IFN $\beta$  20 hr pre-treatment. (C) *Ifnb* transcriptional induction from WT and *L. pneumophila*  $\Delta sdhA$ -infected macrophages of the indicated strains measured by qRT-PCR at 4 hpi. (D) Cell death of B6, *Casp11*<sup>-/-</sup> and *Casp1*<sup>-/-</sup>*Casp11*<sup>-/-</sup> macrophages when challenged with *L. pneumophila*  $\Delta sdhA$ . (E) Representative images of  $\Delta sdhA$  *L. pneumophila* and ASC immunofluorescence by antibody staining at 7 hpi. Images were taken with 20 $\times$  lens; scale bar, 10  $\mu$ m. (F) Left: quantification of ASC-positive staining gated within regions of interest (ROIs), defined as regions of positive anti-*L. pneumophila* signal. Right: quantification of ASC-positive cells from total number of cells enumerated via Hoechst staining. Each symbol is a technical replicate. One representative experiment out of 3 is shown. (G) Whole-cell lysate and precipitated supernatant from *L. pneumophila*-infected cells were probed by western blot for a p17 cleavage product of IL-1 $\beta$ . Representative western blot on the left; quantification from n = 3 on the right.

7 hr of  $\Delta sdhA$  *L. pneumophila* infection (Figure 7A). Mice infected with the  $\Delta sdhA$  mutant recovered their temperature by 20 hr post-infection. In contrast to B6 mice infected with the  $\Delta sdhA$  mutant, *Gbp*<sup>chr3-/-</sup> mice did not exhibit a  $\Delta sdhA$  *L. pneumo-*

*phila*-specific temperature drop at an early time point post-infection. Temperature recovery 1 and 2 days post-infection was also delayed in *Gbp*<sup>chr3-/-</sup> mice when infected with either WT *Legionella* or  $\Delta sdhA$  mutant (Figure 7A).

(J) Percentage of cytosol-accessible *L. pneumophila*  $\Delta sdhA$  based on antibody staining without detergent permeabilization. Data are shown from 2 individual donors.

(K and L) Representative images (K) and quantification (L) of cytosolic *L. pneumophila*  $\Delta sdhA$  in human MDMs in the presence or absence of 40 hr of JAK1 pretreatment. Images taken with 63 $\times$  lens; scale bar, 5  $\mu$ m.

See also Figure S5.

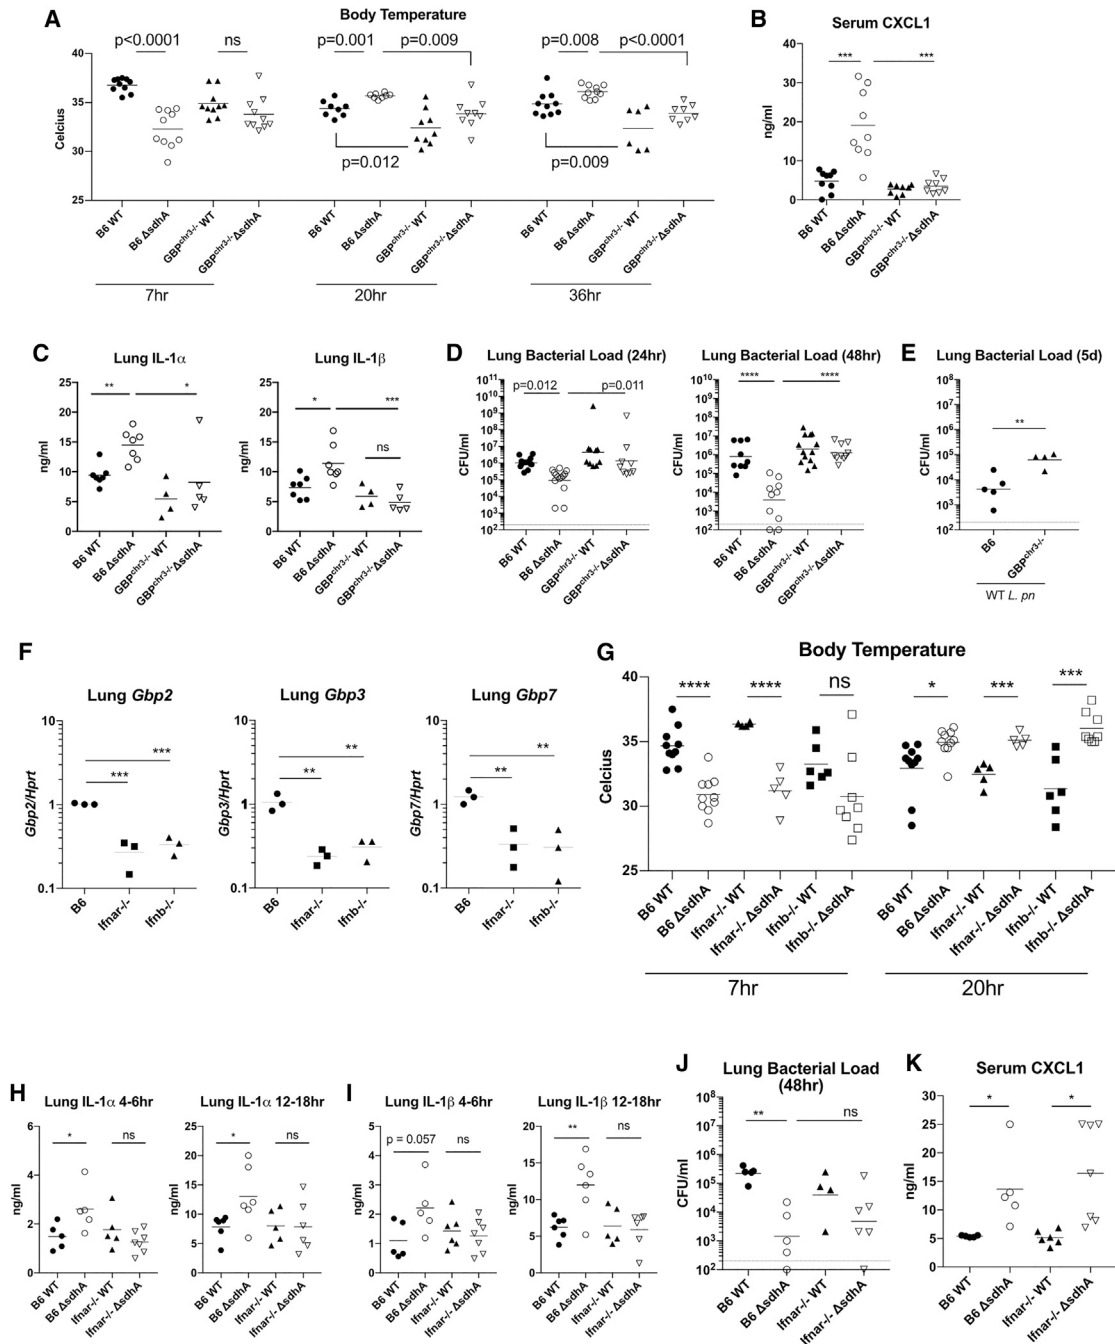

**Figure 7. Chromosome 3 GBPs Are Involved in Restriction of *Legionella* Bacterium during Pneumonia**

(A) Mice were infected with  $1 \times 10^7$  *L. pneumophila* bacteria oropharyngeally. Rectal temperature of mice at various time points post-infection. Each dot represents an animal; results are pooled from 2 experiments.

(B) Serum CXCL1 was measured by ELISA. Each dot represents an animal; results are pooled from 2 experiments in which tissues were harvested between 4 and 6 hr post-infection.

(C) Lung IL-1 $\alpha$  and IL-1 $\beta$  were measured by ELISA. Each dot represents an animal; results are pooled from 2 experiments in which tissues were harvested between 12 and 18 hr post-infection.

(D and E) *Legionella* colony-forming units from whole-lung tissue; the geometric mean is shown. Each dot represents an animal; results are pooled from 2 experiments. Animals were infected with (D) WT or  $\Delta$ sdhA bacterium and (E) WT bacterium.

(F) Whole-lung tissue was extracted from B6, *Ifnar*<sup>-/-</sup>, and *Ifnb*<sup>-/-</sup> animals in the absence of bacterial challenge. Each symbol represents one mouse. mRNA transcripts for indicated *Gbps* were quantified by qRT-PCR.

(legend continued on next page)

Pneumonia models using flagellated *Legionella* had shown that the NLRC4/NAIP5 inflammasome elicits a robust IL-1 response in the lungs. IL-1 receptor signaling was necessary for the induction of CXCL1 to recruit neutrophils, leading to clearance of bacteria (Tateda et al., 2001; Barry et al., 2013). Pyroptotic macrophage corpses have been shown to retain bacteria at the site of infection. CXCL1-driven influx of neutrophils engulfed the macrophage carcasses, along with the trapped bacteria, to facilitate clearance (Jorgensen et al., 2016). CXCL1 thus appears to be crucial for clearance of bacteria that illicit inflammasome activation. Systemically, B6 animals infected with the  $\Delta$ *sdhA* mutant displayed a robust, acute increase in serum CXCL1 that coincides with the dip in body temperature. This induction of serum CXCL1 was absent from *Gbp<sup>chr3-/-</sup>* mice (Figure 7B). Locally, we observed a  $\Delta$ *sdhA*-specific increase in IL-1 $\alpha$  and IL-1 $\beta$  in the lungs of B6 animals 4–6 hr post-infection (Figure S7A). This IL-1 $\alpha$  and IL-1 $\beta$  production was further amplified during the next 10 hr in B6 but was absent from the lungs of *Gbp<sup>chr3-/-</sup>* mice (Figure 7C).

To determine whether the perturbations in cytokine production affected the rate of bacterial clearance, we measured bacterial colony-forming units (CFUs) in the lungs of B6 and *Gbp<sup>chr3-/-</sup>* mice. It is well established that *Legionella* growth is restricted on a C57BL/6 genetic background. We found the restriction was more severe with  $\Delta$ *sdhA* mutant in B6 animals. In contrast, bacterial load of the  $\Delta$ *sdhA* mutant is significantly higher 1 and 2 days post-infection in *Gbp<sup>chr3-/-</sup>* mice (Figure 7D). WT *Legionella* burden was also higher in *Gbp<sup>chr3-/-</sup>* mice by day 5 (Figure 7E).

Finally, to determine whether tonic IFN signaling plays a role in the expression of GBPs *in vivo*, we performed global RNA sequencing (GEO: GSE110678) from lungs of uninfected B6 and *Ifnar<sup>-/-</sup>* animals (Figure S7B). In whole lungs of resting B6 animals, *Gbps* as a gene family are skewed toward higher expression in B6 as opposed to *Ifnar<sup>-/-</sup>* animals, with *Gbp1* and *Gbp11* being undetectable from *Ifnar<sup>-/-</sup>* lungs (Figure S7B). *Gbp2*, *Gbp3*, and *Gbp7* showed small differences in the two strains by global RNA sequencing (GEO: GSE110678), but on further interrogation by RT-PCR, they were found to be significantly reduced in the lungs of both *Ifnar<sup>-/-</sup>* and *Ifnb<sup>-/-</sup>* mice (Figure 7F). We similarly observed reduced expression of *Irf7*, *Isg15*, and *Mx1* in lungs of *Ifnar<sup>-/-</sup>* animals, although not all ISGs appear to depend on IFN $\beta$ , indicating differential roles for various IFNs in tonic signaling (Figure S7C).

When subjected to *Legionella* lung infection, we surprisingly found temperature fluctuation of IFN-deficient animals—*Ifnar<sup>-/-</sup>* and *Ifnb<sup>-/-</sup>* mice—to be similar to that of IFN-sufficient B6 animals (Figure 7G). We found *Ifnb<sup>-/-</sup>* mice exhibit more variability in their response; thus, further experiments are conducted using *Ifnar<sup>-/-</sup>* animals to bypass possible confounding effects is the

various IFN $\alpha$ s that may play a role *in vivo*. In *Ifnar<sup>-/-</sup>* animals, local production of IL-1 $\alpha$  and IL-1 $\beta$  in the lungs was significantly reduced during  $\Delta$ *sdhA* mutant challenge (Figures 7H and 7I), reminiscent of *Gbp<sup>chr3-/-</sup>* mice (Figure 7C; Figure S7A). However, *Ifnar<sup>-/-</sup>* animals remained restrictive to both WT and mutant *Legionella*, because we did not detect a difference in bacterial CFUs between *Ifnar<sup>-/-</sup>* and B6 animals toward the various *Legionella* strains at 48 hr post-infection (Figure 7J). Lastly, we found that *Ifnar<sup>-/-</sup>* animals retained the ability to induce a robust serum CXCL1 response when infected with the  $\Delta$ *sdhA* mutant (Figure 7K). The discrepancy between IL-1 and CXCL1 levels in IFN-deficient animals suggest the surfacing of a compensatory pathway when IFNAR signaling is lost. Work by Schliehe et al. (2015) elucidated one such mechanism, in which reduced expression of *Setdb2* in *Ifnar<sup>-/-</sup>* mice, a repressor of CXCL1 expression, is specifically induced by type I IFN signaling. Loss of IFNAR heightened CXCL1 secretion in response to *Streptococcus pneumoniae* infection (Schliehe et al., 2015). To determine whether breakthrough of CXCL1 may be a contributing factor, we measured the local production of CXCL1 in the lungs and found a trend toward higher lung CXCL1 in *Ifnar<sup>-/-</sup>* mice when infected with the  $\Delta$ *sdhA* mutant, a response that is quiescent in B6 animals. We did not observe this enrichment in lung CXCL1 production in *Gbp<sup>chr3-/-</sup>* animals infected with the  $\Delta$ *sdhA* mutant (Figure S7D). This indicates a possibility that systemic CXCL1 response from *Ifnar<sup>-/-</sup>* mice is GBP independent but stems from a CXCL1 self-amplification loop via other cytosolic-sensing mechanisms.

## DISCUSSION

Macrophage upregulation of an IFN response facilitates antimicrobial activities, including autophagy, pathogen recognition and attack, and host cell death (Randow et al., 2013; Schneider et al., 2014). Many studies have uncovered the mechanism of hyper-IFN-mediated protection (MacMicking, 2012; Pilla-Moffett et al., 2016). However, in the absence of disease and infection, an immunocompetent host is quiescent for cytokine responses, with intermittent spikes of IFN occurring only during infection or immune dysregulation (Bocci, 1985; Taniguchi and Takaoka, 2001; Gough et al., 2012). Little is known about the initial host-pathogen encounter at the onset of infection, before the infection-driven IFN spike. In this work, we set out to investigate the mechanisms by which naive macrophages respond to vacuolar and cytosolic bacteria while simulating a physiologically relevant host-pathogen initial encounter.

Using the cytosol-accessible bacteria *L. pneumophila*  $\Delta$ *sdhA*, we found that caspase-11 action occurred independently of infection-driven IFN feedback. Instead, constitutive IFN signaling in the absence of infection was sufficient to maintain GBP

(G) Body temperature of mice infected with  $1 \times 10^7$  *L. pneumophila* bacteria oropharyngeally. Each dot represents an animal; results are pooled from 2 experiments.

(H and I) Lung IL-1 $\alpha$  and IL-1 $\beta$  measured by ELISA. Each dot represents an animal; results are pooled from 2 experiments in which tissues were harvested between 4 and 6 hpi (H) or 12 and 18 hpi (I).

(J) *Legionella* colony-forming units from whole-lung tissue of B6 and *Ifnar<sup>-/-</sup>* animals.

(K) Serum CXCL1 was measured by ELISA. Each dot represents an animal; results are pooled from 2 experiments in which tissues were harvested between 4 and 6 hpi.

expression and enable GBP activity against cytosol-accessible bacteria. We propose that upon challenge with vacuole-resident bacteria, a small percentage of bacteria that are unable to maintain a stable replication vacuole engage the host cytosolic surveillance pathways as a result of GBP-mediated release of bacterial components. For Gram-negative bacteria, LPS activates caspase-11 (caspase-4/5 in humans), resulting in gasdermin D-dependent pyroptotic cell death (He et al., 2015; Kayagaki et al., 2015; Shi et al., 2015). Simultaneously, GBPs play a role in leakage of bacterial nucleic acids into the cytosol, activating nucleic acid-sensing pathways that can drive transcriptional activity, as well as the canonical caspase-1 inflammasome via AIM2. In the absence of protein translation block, a STING-dependent IFN response would in turn activate neighboring bystander cells, generating an IFN-activated phenotype in uninfected macrophages. Upon further infection, these IFN-activated macrophages would lyse pathogen vacuoles in an event that does not require GBPs encoded on chr3.

The canonical caspase-1 pathway can also contribute to pyroptosis in a GBP-dependent manner to contribute to the local IL-1 response. On a systemic level, IL-1 receptor signaling on endothelial cells amplifies the CXCL1 response to recruit neutrophils to the site of infection. Jorgensen et al. (2016) showed that pyroptotic macrophage corpses can trap cytosolic bacteria, increasing the efficiency by neutrophil internalization and degradation of the invading pathogen. In our *Legionella*-induced pneumonia model, we found that chr3-encoded GBPs are necessary for heightened IL-1 $\alpha$  and IL-1 $\beta$  produced locally in the lungs, systemic CXCL1 response, and timely bacterial clearance.

Upstream of endogenous GBP expression, there exists a sensitive balance in which constitutive cytokine signaling primes the system for critical immune responses to occur upon infection. This concept was best represented in *Irfnb*<sup>-/-</sup> macrophages, in which the loss of ISG expression can be restored with a single low dose of IFN $\beta$ . This indicates that even small, intermittent triggering of the IFN receptor can be effective in maintaining ISG steady-state levels. Several studies show support for the model of constitutive IFN production triggered by cell-intrinsic DNA damage via the cytosolic cGAS/STING pathway (Ahn et al., 2012; Rongvaux et al., 2014; Härtlova et al., 2015; West et al., 2015). In necroptotic cell death, cGAS/STING-mediated constitutive IFN signaling is crucial for maintaining the expression of mixed lineage kinase-like (MLKL) (Sarhan et al., 2018). One can speculate that during homeostasis, self-DNA can stem from a multitude of sources, including microbiota components (Abt et al., 2012), tissue turnover (Lienenklaus et al., 2009), and reactivation of endogenous retroelements (Stetson et al., 2008). Low levels of circulating cytokines can thus condition innate immune cells during their maturation process, determining the rate and mechanism of response during infection. The response to low levels of cytokines is conserved in humans, because human macrophages chronically depleted for JAK1/2 signaling are dampened in their cell death response to cytosol-resident *L. pneumophila*.

## STAR★METHODS

Detailed methods are provided in the online version of this paper and include the following:

- KEY RESOURCES TABLE
- CONTACT FOR REAGENT AND RESOURCE SHARING
- EXPERIMENTAL MODEL AND SUBJECT DETAILS
  - *L. pneumophila* Bacterial Strains
  - Murine Macrophages
  - Murine *in vivo* infections
  - Human peripheral blood monocytes derived macrophages (MDM)
  - Human bronchialveolar lavage cells (BAL)
- METHOD DETAILS
  - *In vitro* *L. pneumophila* infections
  - Kinetic cytotoxicity assay with propidium iodide uptake
  - Western blotting
  - IFN $\beta$  ELISA
  - Quantitative RT-PCR
  - Immunofluorescence microscopy for bacterial morphology
  - Cytosolic plasmid extraction and quantification
  - ASC speck quantification
  - RNA-sequencing
- QUANTIFICATION AND STATISTICAL ANALYSES
- ACCESSION NUMBERS

## SUPPLEMENTAL INFORMATION

Supplemental Information includes seven figures and can be found with this article online at <https://doi.org/10.1016/j.celrep.2018.06.012>.

## ACKNOWLEDGMENTS

We thank Dr. Vishva Dixit and Dr. Stephanie Vogel for the donation of *Casp11*<sup>-/-</sup> mice and *Irfnb*<sup>-/-</sup> mice, respectively. We are grateful to Dr. Katherine Fitzgerald, Dr. Robert O. Watson, and George Papadopoulos for insightful discussion and review of the text. This work was supported by NIH grants AI126050 and AI135369 and the Russian Science Fund Project 15-15-00100 to A. Poltorak and by HHMI and NIAID grant R01AI-113211 to R.R.I. B.C.L. was supported by the HHMI MERGE-ID initiative 56006767 and by NIAID training grant T32 AI 007077. V.I. was supported by Government Contract 6.5111.2017/BCH.

## AUTHOR CONTRIBUTIONS

B.C.L. designed and conducted experiments. B.C.L., A. Poltorak, and R.R.I. interpreted results and wrote the paper. A. Panda provided human BAL cells. V.I. performed RNA sequencing. A. Poltorak and R.R.I. provided guidance and reagents. J.S. and H.I.M. provided technical aid and discussion. M.Y. and J.C. contributed mice and discussion.

## DECLARATION OF INTERESTS

The authors declare no competing interests.

Received: February 10, 2017

Revised: March 19, 2018

Accepted: June 1, 2018

Published: July 3, 2018

## REFERENCES

Aachoui, Y., Leaf, I.A., Hagar, J.A., Fontana, M.F., Campos, C.G., Zak, D.E., Tan, M.H., Cotter, P.A., Vance, R.E., Aderem, A., and Miao, E.A. (2013). Caspase-11 protects against bacteria that escape the vacuole. *Science* 339, 975–978.

- Abt, M.C., Osborne, L.C., Monticelli, L.A., Doering, T.A., Alenghat, T., Sonnenberg, G.F., Paley, M.A., Antenus, M., Williams, K.L., Erikson, J., et al. (2012). Commensal bacteria calibrate the activation threshold of innate antiviral immunity. *Immunity* **37**, 158–170.
- Ahn, J., Gutman, D., Saijo, S., and Barber, G.N. (2012). STING manifests self DNA-dependent inflammatory disease. *Proc. Natl. Acad. Sci. USA* **109**, 19386–19391.
- Asrat, S., Dugan, A.S., and Isberg, R.R. (2014). The frustrated host response to *Legionella pneumophila* is bypassed by MyD88-dependent translation of pro-inflammatory cytokines. *PLoS Pathog.* **10**, e1004229.
- Barry, K.C., Fontana, M.F., Portman, J.L., Dugan, A.S., and Vance, R.E. (2013). IL-1 $\alpha$  signaling initiates the inflammatory response to virulent *Legionella pneumophila* in vivo. *J. Immunol.* **190**, 6329–6339.
- Berger, K.H., and Isberg, R.R. (1993). Two distinct defects in intracellular growth complemented by a single genetic locus in *Legionella pneumophila*. *Mol. Microbiol.* **7**, 7–19.
- Bocci, V. (1985). The physiological interferon response. *Immunol. Today* **6**, 7–9.
- Broz, P., Ruby, T., Belhocine, K., Bouley, D.M., Kayagaki, N., Dixit, V.M., and Monack, D.M. (2012). Caspase-11 increases susceptibility to *Salmonella* infection in the absence of caspase-1. *Nature* **490**, 288–291.
- Case, C.L., Kohler, L.J., Lima, J.B., Strowig, T., de Zoete, M.R., Flavell, R.A., Zamboni, D.S., and Roy, C.R. (2013). Caspase-11 stimulates rapid flagellin-independent pyroptosis in response to *Legionella pneumophila*. *Proc. Natl. Acad. Sci. USA* **110**, 1851–1856.
- Casson, C.N., Yu, J., Reyes, V.M., Taschuk, F.O., Yadav, A., Copenhaver, A.M., Nguyen, H.T., Collman, R.G., and Shin, S. (2015). Human caspase-4 mediates noncanonical inflammasome activation against gram-negative bacterial pathogens. *Proc. Natl. Acad. Sci. USA* **112**, 6688–6693.
- Coers, J., Vance, R.E., Fontana, M.F., and Dietrich, W.F. (2007). Restriction of *Legionella pneumophila* growth in macrophages requires the concerted action of cytokine and Naip5/Ipaf signalling pathways. *Cell. Microbiol.* **9**, 2344–2357.
- Corrales, L., Woo, S.-R., Williams, J.B., McWhirter, S.M., Dubensky, T.W., Jr., and Gajewski, T.F. (2016). Antagonism of the STING pathway via activation of the AIM2 inflammasome by intracellular DNA. *J. Immunol.* **196**, 3191–3198.
- Creasey, E.A., and Isberg, R.R. (2012). The protein SdhA maintains the integrity of the *Legionella*-containing vacuole. *Proc. Natl. Acad. Sci. USA* **109**, 3481–3486.
- Davies, J.Q., and Gordon, S. (2005). Isolation and culture of human macrophages. In *Basic Cell Culture Protocols*, C.D. Helgason and C.L. Miller, eds. (Humana Press), pp. 105–116.
- Dill, M.T., Makowska, Z., Trincucci, G., Gruber, A.J., Vogt, J.E., Filipowicz, M., Calabrese, D., Krol, I., Lau, D.T., Terracciano, L., et al. (2014). Pegylated IFN- $\alpha$  regulates hepatic gene expression through transient Jak/STAT activation. *J. Clin. Invest.* **124**, 1568–1581.
- Finethy, R., Jorgensen, I., Haldar, A.K., de Zoete, M.R., Strowig, T., Flavell, R.A., Yamamoto, M., Nagarajan, U.M., Miao, E.A., and Coers, J. (2015). Guanylate binding proteins enable rapid activation of canonical and noncanonical inflammasomes in *Chlamydia*-infected macrophages. *Infect. Immun.* **83**, 4740–4749.
- Fontana, M.F., Banga, S., Barry, K.C., Shen, X., Tan, Y., Luo, Z.Q., and Vance, R.E. (2011). Secreted bacterial effectors that inhibit host protein synthesis are critical for induction of the innate immune response to virulent *Legionella pneumophila*. *PLoS Pathog.* **7**, e1001289.
- Freeman, C.M., Crudgington, S., Stolberg, V.R., Brown, J.P., Sonstein, J., Alexis, N.E., Doerschuk, C.M., Basta, P.V., Carretta, E.E., Couper, D.J., et al. (2015). Design of a multi-center immunophenotyping analysis of peripheral blood, sputum and bronchoalveolar lavage fluid in the Subpopulations and Intermediate Outcome Measures in COPD Study (SPIROMICS). *J. Transl. Med.* **13**, 19.
- Ge, J., Gong, Y.-N., Xu, Y., and Shao, F. (2012). Preventing bacterial DNA release and absent in melanoma 2 inflammasome activation by a *Legionella* effector functioning in membrane trafficking. *Proc. Natl. Acad. Sci. USA* **109**, 6193–6198.
- Gough, D.J., Messina, N.L., Hii, L., Gould, J.A., Sabapathy, K., Robertson, A.P.S., Trapani, J.A., Levy, D.E., Hertzog, P.J., Clarke, C.J.P., and Johnstone, R.W. (2010). Functional crosstalk between type I and II interferon through the regulated expression of STAT1. *PLoS Biol.* **8**, e1000361.
- Gough, D.J., Messina, N.L., Clarke, C.J.P., Johnstone, R.W., and Levy, D.E. (2012). Constitutive type I interferon modulates homeostatic balance through tonic signaling. *Immunity* **36**, 166–174.
- Härtlova, A., Erttmann, S.F.F., Raffi, F.A.A., Schmalz, A.M.M., Resch, U., Anugula, S., Lienenklaus, S., Nilsson, L.M.M., Kröger, A., Nilsson, J.A.A., et al. (2015). DNA damage primes the type I interferon system via the cytosolic DNA sensor STING to promote anti-microbial innate immunity. *Immunity* **42**, 332–343.
- He, W.T., Wan, H., Hu, L., Chen, P., Wang, X., Huang, Z., Yang, Z.-H., Zhong, C.-Q., and Han, J. (2015). Gasdermin D is an executor of pyroptosis and required for interleukin-1 $\beta$  secretion. *Cell Res.* **25**, 1285–1298.
- Isberg, R.R., O'Connor, T.J., and Heidtman, M. (2009). The *Legionella pneumophila* replication vacuole: making a cosy niche inside host cells. *Nat. Rev. Microbiol.* **7**, 13–24.
- Ivanov, S.S., and Roy, C.R. (2013). Pathogen signatures activate a ubiquitination pathway that modulates the function of the metabolic checkpoint kinase mTOR. *Nat. Immunol.* **14**, 1219–1228.
- Jackson, J.D., Markert, J.M., Li, L., Carroll, S.L., and Cassady, K.A. (2016). STAT1 and NF- $\kappa$ B inhibitors diminish basal interferon-stimulated gene expression and improve the productive infection of oncolytic HSV in MPNST cells. *Mol. Cancer Res.* **14**, 482–492.
- Jaguin, M., Houlbert, N., Fardel, O., and Lecreur, V. (2013). Polarization profiles of human M-CSF-generated macrophages and comparison of M1-markers in classically activated macrophages from GM-CSF and M-CSF origin. *Cell Immunol.* **287**, 51–61.
- Jorgensen, I., Zhang, Y., Krantz, B.A., and Miao, E.A. (2016). Pyroptosis triggers pore-induced intracellular traps (PITs) that capture bacteria and lead to their clearance by efferocytosis. *J. Exp. Med.* **213**, 2113–2128.
- Kayagaki, N., Warming, S., Lamkanfi, M., Vande Walle, L., Louie, S., Dong, J., Newton, K., Qu, Y., Liu, J., Heldens, S., et al. (2011). Non-canonical inflammasome activation targets caspase-11. *Nature* **479**, 117–121.
- Kayagaki, N., Wong, M.T., Stowe, I.B., Ramani, S.R., Gonzalez, L.C., Akashi-Takamura, S., Miyake, K., Zhang, J., Lee, W.P., Muszyński, A., et al. (2013). Noncanonical inflammasome activation by intracellular LPS independent of TLR4. *Science* **341**, 1246–1249.
- Kayagaki, N., Stowe, I.B., Lee, B.L., O'Rourke, K., Anderson, K., Warming, S., Cuellar, T., Haley, B., Roose-Girma, M., Phung, Q.T., et al. (2015). Caspase-11 cleaves gasdermin D for non-canonical inflammasome signalling. *Nature* **526**, 666–671.
- Kim, B.-H., Shenoy, A.R., Kumar, P., Das, R., Tiwari, S., and MacMicking, J.D. (2011). A family of IFN- $\gamma$ -inducible 65-kD GTPases protects against bacterial infection. *Science* **332**, 717–721.
- Laguna, R.K., Creasey, E.A., Li, Z., Valtz, N., and Isberg, R.R. (2006). A *Legionella pneumophila*-translocated substrate that is required for growth within macrophages and protection from host cell death. *Proc. Natl. Acad. Sci. USA* **103**, 18745–18750.
- LaRock, D.L., Chaudhary, A., and Miller, S.I. (2015). Salmonellae interactions with host processes. *Nat. Rev. Microbiol.* **13**, 191–205.
- Li, P., Allen, H., Banerjee, S., Franklin, S., Herzog, L., Johnston, C., McDowell, J., Paskind, M., Rodman, L., Salfeld, J., et al. (1995). Mice deficient in IL-1 beta-converting enzyme are defective in production of mature IL-1 beta and resistant to endotoxic shock. *Cell* **80**, 401–411.
- Lienenklaus, S., Cornitescu, M., Zietara, N., Łyszkiwicz, M., Gekara, N., Jabłńska, J., Edenhofer, F., Rajewsky, K., Bruder, D., Hafner, M., et al. (2009). Novel reporter mouse reveals constitutive and inflammatory expression of IFN-beta in vivo. *J. Immunol.* **183**, 3229–3236.
- Lippmann, J., Müller, H.C., Naujoks, J., Tabeling, C., Shin, S., Witzenrath, M., Hellwig, K., Kirschning, C.J., Taylor, G.A., Barchet, W., et al. (2011). Dissection

- of a type I interferon pathway in controlling bacterial intracellular infection in mice. *Cell. Microbiol.* **13**, 1668–1682.
- MacMicking, J.D. (2012). Interferon-inducible effector mechanisms in cell-autonomous immunity. *Nat. Rev. Immunol.* **12**, 367–382.
- Man, S.M., Karki, R., Malireddi, R.K.S., Neale, G., Vogel, P., Yamamoto, M., Lamkanfi, M., and Kanneganti, T.D. (2015). The transcription factor IRF1 and guanylate-binding proteins target activation of the AIM2 inflammasome by *Francisella* infection. *Nat. Immunol.* **16**, 467–475.
- Man, S.M., Karki, R., Sasai, M., Place, D.E., Kesavardhana, S., Temirov, J., Frase, S., Zhu, Q., Malireddi, R.K.S., Kuriakose, T., et al. (2016). IRGB10 liberates bacterial ligands for sensing by the AIM2 and caspase-11-NLRP3 inflammasomes. *Cell* **167**, 382–396.
- Meunier, E., and Broz, P. (2015). Interferon-induced guanylate-binding proteins promote cytosolic lipopolysaccharide detection by caspase-11. *DNA Cell Biol.* **34**, 1–5.
- Meunier, E., Dick, M.S., Dreier, R.F., Schürmann, N., Kenzelmann Broz, D., Warming, S., Roose-Girma, M., Bumann, D., Kayagaki, N., Takeda, K., et al. (2014). Caspase-11 activation requires lysis of pathogen-containing vacuoles by IFN-induced GTPases. *Nature* **509**, 366–370.
- Meunier, E., Wallet, P., Dreier, R.F., Costanzo, S., Anton, L., Rühl, S., Dussurget, S., Dick, M.S., Kistner, A., Rigard, M., et al. (2015). Guanylate-binding proteins promote activation of the AIM2 inflammasome during infection with *Francisella novicida*. *Nat. Immunol.* **16**, 476–484.
- Monroe, K.M., McWhirter, S.M., and Vance, R.E. (2009). Identification of host cytosolic sensors and bacterial factors regulating the type I interferon response to *Legionella pneumophila*. *PLoS Pathog.* **5**, e1000665.
- Morales, V.M., Bäckman, A., and Bagdasarian, M. (1991). A series of wide-host-range low-copy-number vectors that allow direct screening for recombinants. *Gene* **97**, 39–47.
- Mostafavi, S., Yoshida, H., Moodley, D., LeBoité, H., Rothamel, K., Raj, T., Ye, C.J., Chevrier, N., Zhang, S.-Y.Y., Feng, T., et al.; Immunological Genome Project Consortium (2016). Parsing the interferon transcriptional network and its disease associations. *Cell* **164**, 564–578.
- O'Connor, T.J., Boyd, D., Dorer, M.S., and Isberg, R.R. (2012). Aggravating genetic interactions allow a solution to redundancy in a bacterial pathogen. *Science* **338**, 1440–1444.
- Pilla, D.M., Hagar, J.A., Haldar, A.K., Mason, A.K., Degrandi, D., Pfeffer, K., Ernst, R.K., Yamamoto, M., Miao, E.A., and Coers, J. (2014). Guanylate binding proteins promote caspase-11-dependent pyroptosis in response to cytoplasmic LPS. *Proc. Natl. Acad. Sci. USA* **111**, 6046–6051.
- Pilla-Moffett, D., Barber, M.F., Taylor, G.A., and Coers, J. (2016). Interferon-inducible GTPases in host resistance, inflammation and disease. *J. Mol. Biol.* **428**, 3495–3513.
- Pott, J., Mahlaköiv, T., Mordstein, M., Duerr, C.U., Michiels, T., Stockinger, S., Staeheli, P., and Hornef, M.W. (2011). IFN- $\lambda$  determines the intestinal epithelial antiviral host defense. *Proc. Natl. Acad. Sci. USA* **108**, 7944–7949.
- Randow, F., MacMicking, J.D., and James, L.C. (2013). Cellular self-defense: how cell-autonomous immunity protects against pathogens. *Science* **340**, 701–706.
- Rathinam, V.A., Vanaja, S.K., Waggoner, L., Sokolovska, A., Becker, C., Stuart, L.M., Leong, J.M., and Fitzgerald, K.A. (2012). TRIF licenses caspase-11-dependent NLRP3 inflammasome activation by gram-negative bacteria. *Cell* **150**, 606–619.
- Ren, T., Zamboni, D.S., Roy, C.R., Dietrich, W.F., and Vance, R.E. (2006). Flagellin-deficient *Legionella* mutants evade caspase-1- and Naip5-mediated macrophage immunity. *PLoS Pathog.* **2**, e18.
- Roberts, Z.J., Goutagny, N., Perera, P.-Y., Kato, H., Kumar, H., Kawai, T., Akira, S., Savan, R., van Echo, D., Fitzgerald, K.A., et al. (2007). The chemotherapeutic agent DMXAA potently and specifically activates the TBK1-IRF-3 signaling axis. *J. Exp. Med.* **204**, 1559–1569.
- Rocha, B.C., Marques, P.E., Leoratti, F.M.S., Junqueira, C., Pereira, D.B., Antonelli, L.R.D.V., Menezes, G.B., Golenbock, D.T., and Gazzinelli, R.T. (2015). Type I interferon transcriptional signature in neutrophils and low-density granulocytes are associated with tissue damage in malaria. *Cell Rep.* **13**, 2829–2841.
- Rongvaux, A., Jackson, R., Harman, C.C.D., Li, T., West, A.P., de Zoete, M.R., Wu, Y., Yordy, B., Lakhani, S.A., Kuan, C.-Y.Y., et al. (2014). Apoptotic caspases prevent the induction of type I interferons by mitochondrial DNA. *Cell* **159**, 1563–1577.
- Sarhan, J., Liu, B.C., Muendlein, H.I., Weindel, C.G., Smirnova, I., Tang, A.Y., Ilyukha, V., Sorokin, M., Buzdin, A., Fitzgerald, K.A., et al. (2018). Constitutive interferon signaling maintains critical threshold of MLKL expression to license necroptosis. *Cell Death Differ.* Published online May 21, 2018. <https://doi.org/10.1038/s41418-018-0122-7>.
- Schliehe, C., Flynn, E.K., Vilagos, B., Richson, U., Swaminathan, S., Bosnjak, B., Bauer, L., Kandasamy, R.K., Griesshammer, I.M., Kosack, L., et al. (2015). The methyltransferase Setdb2 mediates virus-induced susceptibility to bacterial superinfection. *Nat. Immunol.* **16**, 67–74.
- Schneider, W.M., Chevillotte, M.D., and Rice, C.M. (2014). Interferon-stimulated genes: a complex web of host defenses. *Annu. Rev. Immunol.* **32**, 513–545.
- Shi, J., Zhao, Y., Wang, Y., Gao, W., Ding, J., Li, P., Hu, L., and Shao, F. (2014). Inflammatory caspases are innate immune receptors for intracellular LPS. *Nature* **514**, 187–192.
- Shi, J., Zhao, Y., Wang, K., Shi, X., Wang, Y., Huang, H., Zhuang, Y., Cai, T., Wang, F., and Shao, F. (2015). Cleavage of GSDMD by inflammatory caspases determines pyroptotic cell death. *Nature* **526**, 660–665.
- St-Laurent, J., Turmel, V., Boulet, L.-P.P., and Bissonnette, E. (2009). Alveolar macrophage subpopulations in bronchoalveolar lavage and induced sputum of asthmatic and control subjects. *J. Asthma* **46**, 1–8.
- Stetson, D.B., Ko, J.S., Heidmann, T., and Medzhitov, R. (2008). Trex1 prevents cell-intrinsic initiation of autoimmunity. *Cell* **134**, 587–598.
- Taniguchi, T., and Takaoka, A. (2001). A weak signal for strong responses: interferon- $\alpha/\beta$  revisited. *Nat. Rev. Mol. Cell Biol.* **2**, 378–386.
- Tateda, K., Moore, T.A., Newstead, M.W., Tsai, W.C., Zeng, X., Deng, J.C., Chen, G., Reddy, R., Yamaguchi, K., and Standiford, T.J. (2001). Chemokine-dependent neutrophil recruitment in a murine model of *Legionella* pneumonia: potential role of neutrophils as immunoregulatory cells. *Infect. Immun.* **69**, 2017–2024.
- Wallach, D., Kang, T.-B., Dillon, C.P., and Green, D.R. (2016). Programmed necrosis in inflammation: Toward identification of the effector molecules. *Science* **352**, aaf2154.
- Wang, Y., Ning, X., Gao, P., Wu, S., Sha, M., Lv, M., Zhou, X., Gao, J., Fang, R., Meng, G., et al. (2017). Inflammasome activation triggers caspase-1-mediated cleavage of cGAS to regulate responses to DNA virus infection. *Immunity* **46**, 393–404.
- West, A.P., Khoury-Hanold, W., Staron, M., Tal, M.C., Pineda, C.M., Lang, S.M., Bestwick, M., Duguay, B.A., Raimundo, N., MacDuff, D.A., et al. (2015). Mitochondrial DNA stress primes the antiviral innate immune response. *Nature* **520**, 553–557.
- Yamamoto, M., Okuyama, M., Ma, J.S., Kimura, T., Kamiyama, N., Saiga, H., Ohshima, J., Sasai, M., Kayama, H., Okamoto, T., et al. (2012). A cluster of interferon- $\gamma$ -inducible p65 GTPases plays a critical role in host defense against *Toxoplasma gondii*. *Immunity* **37**, 302–313.
- Yang, J., Zhao, Y., and Shao, F. (2015). Non-canonical activation of inflammatory caspases by cytosolic LPS in innate immunity. *Curr. Opin. Immunol.* **32**, 78–83.
- Zheng, Y., Lilo, S., Brodsky, I.E., Zhang, Y., Medzhitov, R., Marcu, K.B., and Bliska, J.B. (2011). A *Yersinia* effector with enhanced inhibitory activity on the NF- $\kappa$ B pathway activates the NLRP3/ASC/caspase-1 inflammasome in macrophages. *PLoS Pathog.* **7**, e1002026.
- Zurney, J., Howard, K.E., and Sherry, B. (2007). Basal expression levels of IFNAR and Jak-STAT components are determinants of cell-type-specific differences in cardiac antiviral responses. *J. Virol.* **81**, 13668–13680.

## STAR★METHODS

### KEY RESOURCES TABLE

| REAGENT or RESOURCE                                                                                                                    | SOURCE                                      | IDENTIFIER                                      |
|----------------------------------------------------------------------------------------------------------------------------------------|---------------------------------------------|-------------------------------------------------|
| <b>Antibodies</b>                                                                                                                      |                                             |                                                 |
| Anti-Caspase-11 clone 17D9                                                                                                             | Cell Signaling Technology                   | 14340                                           |
| Anti-GBP2                                                                                                                              | Proteintech                                 | 11854-1-AP                                      |
| Anti-phospho-Stat1 Y701 58D6                                                                                                           | Cell Signaling technology                   | 9167                                            |
| Anti-STAT1                                                                                                                             | Cell signaling technology                   | 9172                                            |
| Rabbit polyclonal serum against <i>L. pneumophila</i>                                                                                  | Isberg Lab                                  | (Laguna et al., 2006; Creasey and Isberg, 2012) |
| Rat polyclonal serum against <i>L. pneumophila</i>                                                                                     | Isberg Lab                                  | (Laguna et al., 2006; Creasey and Isberg, 2012) |
| Anti-ASC                                                                                                                               | Adipogen                                    | AG-25B-0006                                     |
| Anti-Gapdh 14C10                                                                                                                       | Cell Signaling Technology                   | 2118                                            |
| Anti-Gapdh D4C6R                                                                                                                       | Cell Signaling Technology                   | 97166                                           |
| Anti-IFN $\beta$ (ELISA capture antibody)                                                                                              | Santa Cruz                                  | sc-57201                                        |
| Anti-IFN $\beta$ (ELISA detection antibody)                                                                                            | R&D Systems                                 | 32400-1                                         |
| <b>Bacterial and Virus Strains</b>                                                                                                     |                                             |                                                 |
| <i>L. pneumophila</i> Lp02 $\Delta$ <i>flaA</i>                                                                                        | Isberg Lab                                  | (Creasey and Isberg, 2012; Asrat et al., 2014)  |
| <i>L. pneumophila</i> Lp02 $\Delta$ <i>flaA</i> $\Delta$ <i>sdhA</i>                                                                   | Isberg Lab                                  | (Creasey and Isberg, 2012)                      |
| <i>L. pneumophila</i> Lp03 ( <i>dotA</i> -) $\Delta$ <i>flaA</i>                                                                       | Isberg Lab                                  | (Asrat et al., 2014)                            |
| <i>L. pneumophila</i> Lp02 $\Delta$ <i>flaA</i> <i>P</i> <sub>tac</sub> :: <i>P</i> <sub>ahpC</sub> :: <i>Gfp</i>                      | Isberg Lab                                  | (Coers et al., 2007; O'Connor et al., 2012)     |
| <i>L. pneumophila</i> Lp02 $\Delta$ <i>flaA</i> $\Delta$ <i>sdhA</i> <i>P</i> <sub>tac</sub> :: <i>P</i> <sub>ahpC</sub> :: <i>Gfp</i> | Isberg Lab                                  | (Coers et al., 2007; O'Connor et al., 2012)     |
| <i>L. pneumophila</i> Lp02 $\Delta$ <i>flaA</i> pJB908                                                                                 | Isberg Lab                                  | (Laguna et al., 2006; Ge et al., 2012)          |
| <i>L. pneumophila</i> Lp02 $\Delta$ <i>flaA</i> $\Delta$ <i>sdhA</i> pJB908                                                            | Isberg Lab                                  | (Laguna et al., 2006; Ge et al., 2012)          |
| <b>Biological Samples</b>                                                                                                              |                                             |                                                 |
| Human Bronchoalveolar lavage cells                                                                                                     | Tufts Medical Center, Alexander Panda, M.D. | De-identified volunteers                        |
| Human peripheral whole blood                                                                                                           | NY Biologics                                | De-identified whole blood                       |
| <b>Chemicals, Peptides, and Recombinant Proteins</b>                                                                                   |                                             |                                                 |
| Purified NA/LE Mouse anti-mouse IFNAR $\alpha$ / $\beta$ receptor MAR1-5A3                                                             | BD PharMingen                               | 561183                                          |
| Purified NA/LE Mouse IgG1 $\kappa$ Isotype control                                                                                     | BD PharMingen                               | 553447                                          |
| Jak inhibitor Ruxolitinib                                                                                                              | Cayman Chemical                             | 11609                                           |
| Recombinant mouse IFN $\beta$                                                                                                          | PBL                                         | 12400-1                                         |
| TMB substrate                                                                                                                          | ThermoFisher                                | N301                                            |
| <b>Deposited Data</b>                                                                                                                  |                                             |                                                 |
| Mi-Seq GSE110678                                                                                                                       | This paper                                  | N/A                                             |
| <b>Experimental Models: Cell Lines</b>                                                                                                 |                                             |                                                 |
| Murine bone marrow derived macrophages                                                                                                 | Mouse long bones                            | N/A                                             |
| <b>Experimental Models: Organisms/Strains</b>                                                                                          |                                             |                                                 |
| C57BL/6                                                                                                                                | Jackson Laboratory                          | 000664                                          |
| <i>Ifnar</i> <sup>-/-</sup> (B6.129S2- <i>Ifnar1</i> <sup>tm1Agt</sup> /Mmjax)                                                         | Jackson Laboratory                          | 32045-JAX                                       |
| <i>Ifnb</i> <sup>-/-</sup>                                                                                                             | Dr. Stephanie Vogel                         | N/A                                             |
| GBP <sup>chr3-/-</sup>                                                                                                                 | Dr. Jorn Coers; Dr. Masahiro Yamamoto       | (Yamamoto et al., 2012; Pilla et al., 2014)     |
| <i>Casp11</i> <sup>-/-</sup>                                                                                                           | Dr. Vishva Dixit                            | (Kayagaki et al., 2011, 2013)                   |
| <i>Casp1</i> <sup>-/-</sup> <i>Casp11</i> <sup>-/-</sup>                                                                               | Jackson Laboratory                          | (Li et al., 1995)                               |
| <i>Asc</i> <sup>-/-</sup>                                                                                                              | Dr. Kate Fitzgerald                         | (Zheng et al., 2011)                            |

(Continued on next page)



**Continued**

| REAGENT or RESOURCE                                                                                                  | SOURCE     | IDENTIFIER                    |
|----------------------------------------------------------------------------------------------------------------------|------------|-------------------------------|
| Oligonucleotides                                                                                                     |            |                               |
| Forward and reverse primers for <i>Gbps</i>                                                                          | Sigma      | (Kim et al., 2011) Table S2   |
| Forward and reverse primers for <i>Casp11</i>                                                                        | Sigma      | (Kayagaki et al., 2011)       |
| Murine <i>Irf7</i> : (F) 5'-CTTCAGCACTTTCTTCCGAGA-3'; (R) 5'-TGTAGTGTGGTGACCCCTTGC-3'                                | Sigma      | (Rocha et al., 2015) Table S4 |
| Murine <i>Isg15</i> : (F) 5'-GAGCTAGAGCCTGCAGCAAT-3'; (R) 5'-TTCTGGGCAATCTGCTTCTT-3'                                 | Sigma      | (Pott et al., 2011)           |
| Murine <i>Mx1</i> : (F) 5'-TCTGAGGAGAGCCAGACGAT-3'; (R) 5'-ACTCTGGTCCCAATGACAG-3'                                    | Sigma      | (Pott et al., 2011)           |
| human <i>IRF7</i> (F) 5'-CTTGGCTCCTGAGAGGGCAG-3'; (R) 5'-CGAAGTGCTTCCAGGGCA-3'                                       | Sigma      | (Dill et al., 2014) Table S5  |
| human <i>ISG15</i> (F) 5'-TCCTGCTGGTGGTGGACAA-3'; (R) 5'-TTGTTATTCTCACCAGGATGCT-3'                                   | Sigma      | (Dill et al., 2014) Table S5  |
| human <i>Mx1</i> (F) 5'-GTGCATTGCAGAAGGTCAGA-3'; (R) 5'-TCAGGAGCCAGCTTAGGTGT-3'                                      | Sigma      | (Dill et al., 2014) Table S5  |
| human <i>GAPDH</i> (F) 5'-GCTCCTCCTGTTTCGACA GTCA-3'; (R) 5'-ACCTTCCCCTGGTGTCTGA-3'                                  | Sigma      | (Dill et al., 2014) Table S5  |
| pJB908 plasmid amplification (F) 5'-TCAGGAA GCACAAATGTCAATG-3'; (R) 5'-GGTCTA CACCACCAAATCACG-3'                     | Sigma      | (Ge et al., 2012)             |
| Primers for pUC18 flanks the M13 cloning site of the vector. (F) 5'-CAGGAAACAGCTATGAC -3'; (R) 5'-GTAAACGACGGCCAG-3' | Sigma      | Isberg Lab                    |
| Recombinant DNA                                                                                                      |            |                               |
| pJB908 (pMMB66EH <i>ori</i> <sub>RSF1010</sub> <i>ΔoriT</i> <i>tdΔi bla</i> <sup>+</sup> )                           | Isberg Lab | (Laguna et al., 2006)         |
| <i>P</i> <sub>tac</sub> :: <i>P</i> <sub>ahpC</sub> :: <i>Gfp</i> (pMMB207 <i>Δmob267</i> )                          | Isberg Lab | (O'Connor et al., 2012)       |
| Software and Algorithms                                                                                              |            |                               |
| GraphPad Prism7                                                                                                      | GraphPad   | N/A                           |
| Adobe Photoshop                                                                                                      | Adobe      | N/A                           |
| Affinity Designer                                                                                                    | Affinity   | N/A                           |

**CONTACT FOR REAGENT AND RESOURCE SHARING**

Requests for resources and reagents described in manuscript should be directed to Dr. Alexander Poltorak ([alexander.poltorak@tufts.edu](mailto:alexander.poltorak@tufts.edu)).

**EXPERIMENTAL MODEL AND SUBJECT DETAILS**

**L. pneumophila Bacterial Strains**

All *L. pneumophila* strains used in the present study are deficient for flagellin (*ΔflaA*) to mimic growth in amoeba and human macrophages and bypass the NLRP4/Naip5/Caspase-1 cell death pathway that occurs on the C57BL/6 genetic background. *L. pneumophila* derivatives used in this study were Lp02*ΔflaA* (*thyA rpsL ΔflaA*; referred to as WT), Lp02*ΔflaAΔsdhA* (*thyA rpsL ΔflaA ΔsdhA*; referred to as *ΔsdhA*), and Lp03*ΔflaA* (*dotA3 thyA rpsL ΔflaA*; referred to as *dotA*<sup>-</sup>). All strains were derived originally from *Legionella pneumophila* Philadelphia-1 (Berger and Isberg, 1993). *L. pneumophila* was propagated on charcoal-N-(2-acetamido)-2-aminoethanesulfonic acid (ACES)-yeast extract plates with 0.1mg/mL thymidine (CYE/T) and in ACES-yeast extract broth (AYE/T) with 0.2mg/mL thymidine as previously described (Creasey and Isberg, 2012; Asrat et al., 2014).

To generate *L. pneumophila*-GFP, PCR-amplified *gfp* gene was fused to *P*<sub>ahpC</sub> (Coers et al., 2007) and inserted downstream of *P*<sub>tac</sub> in the plasmid pMMB207 *Δmob267* {Morales et al. 1991 #1; O'Connor et al. 2012 #2; kind gift of Dr. Kimberly Davis} (Morales et al., 1991; O'Connor et al., 2012). Strains harboring the plasmid were maintained on CYE plates containing 0.1mg/mL thymidine and 5 μg/mL chloramphenicol. Prior to challenge of cultured cells, AYE broth cultures containing 0.2mg/mL thymidine and 2mM IPTG were grown to post-exponential phase, as described {Asrat et al., 2014 #3}. Inoculation into macrophage monolayer cultures was carried out at MOI = 10 in the presence of 2mM IPTG.

The plasmid pJB908 was described previously (pMMB66EH *ori<sub>RSF1010</sub> ΔoriT tdΔi bla<sup>+</sup>*; Laguna et al., 2006). For selection, pJB908-containing strains were grown on CYE plates or in AYE broth in the absence of added thymidine.

### Murine Macrophages

8–10-weeks-old male and female mice are used for this study. C57BL/6 and *Ifnar*<sup>-/-</sup> mice were obtained from Jackson Laboratory. *Ifnb*<sup>-/-</sup> mice and *Casp11*<sup>-/-</sup> mice were kind gifts from Dr. Stephanie Vogel and Dr. Vishva Dixit respectively. All animal studies were approved by the Institutional Animal Care and Use Committee of Tufts University. Bone marrow macrophages are from *Gbp<sup>chr3</sup>*<sup>-/-</sup> mice (Pilla et al., 2014; Yamamoto et al., 2012). Bone marrow-derived macrophages were isolated from mice and propagated for 7 days in RPMI containing 20% FBS, 30% L cell supernatant, 2% Penn/Strep on non-tissue culture treated Petri dishes (Asrat et al., 2014).

### Murine *in vivo* infections

Animal infection protocols were approved by the Tufts University Medical School Animal Care and Use Committees. Male and female mice between 8–10-weeks-old are used. C57BL/6, *Ifnar*<sup>-/-</sup>, *Gbp<sup>chr3</sup>*<sup>-/-</sup>, and *Ifnb*<sup>-/-</sup> mice were oropharyngeally inoculated with 1x10<sup>7</sup> bacteria under isoflurane anesthesia. Temperature was monitored via rectal thermometer. At time points indicated in the text and figures, mice were euthanized via CO<sub>2</sub> asphyxiation, and blood and lungs were harvested for downstream cytokine and bacterial load quantification.

### Human peripheral blood monocytes derived macrophages (MDM)

De-identified human peripheral blood was obtained from New York Biologics. The use of de-identified human samples followed a protocol approved by the Tufts University School of Medicine Institutional Review Board. No information on age and sex of the donor were provided by NY Biologics. Monocytes were obtained from peripheral blood using the EasySep Direct Monocyte Isolation Kit (STEMCELL technologies). CD14<sup>+</sup>CD16<sup>-</sup>CD68<sup>-</sup> monocytes were extracted and differentiated into CD14<sup>+</sup>CD16<sup>-</sup>CD68<sup>+</sup> macrophages over the course of 7 days in RPMI containing 20% FBS, 200 IU/mL Penicillin and 200 μg/ml Streptomycin, and 100 μg/ml of human monocyte colony stimulating factor (M-CSF; PeproTech) (Davies and Gordon, 2005; Jaguin et al., 2013). Nonpolarized MDMs were cultured for 40 hr further in RPMI containing 10% FBS, 200 IU/ml Penicillin and 200 μg/ml Streptomycin, in the absence of M-CSF prior to infection. Infection was carried out at MOI = 10.

### Human bronchoalveolar lavage cells (BAL)

Bronchoalveolar (BAL) lavage of humans was performed at Tufts Medical Center. BAL was obtained with informed consent under a protocol approved by the Tufts University School of Medicine Institutional Review Board. Subjects underwent fiberoptic bronchoscopy and BAL with 180 mL of lavage solution. With the subject under local anesthesia, a 5.5-mm O.D. fiberoptic bronchoscope was advanced through the mouth and into the trachea and was wedged into a segmental or subsegmental bronchus of the right upper lobe. The wedged lung segment was lavaged with three aliquots of 60 mL each of normal sterile saline prewarmed to 37°C; and the fluid was gently aspirated (St-Laurent et al., 2009; Freeman et al., 2015). BAL fluids were provided without information on age and sex of the donors. Cells were strained from BAL fluid using 70 μm cell strainers and allowed to adhere to experimental dishes in RPMI containing 10% FBS and 200 IU/ml Penicillin and 200 μg/ml Streptomycin, at a density of 0.5x 10<sup>6</sup> cells per cm<sup>2</sup>. Cells were allowed to attach for 2 hr at 37°C, 5% CO<sub>2</sub>, at which point non-adherent cells and antibiotics were washed away with RPMI plus 10% FBS (Davies and Gordon, 2005). Bacteria were inoculated at an MOI = 10.

## METHOD DETAILS

### *In vitro* *L. pneumophila* infections

For infection of murine and human macrophages, *L. pneumophila* was infected at MOI = 10, in the absence of antibiotics.

### Kinetic cytotoxicity assay with propidium iodide uptake

Cells were incubated in clear bottom 96 well microplates (Costar 3603) in media containing 10 μg/mL propidium iodide (PI; Life Technologies, P3566). A TECAN Infinite 200 Pro plate reader was used to maintain temperature at 37°C and 5% CO<sub>2</sub> during incubations. PI uptake was monitored every 10 min at 535 nm excitation and 617 nm emission, using bottom reading setting. For 100% cytotoxicity control, cells were treated with 0.1% Triton X-100, similar to protocols for measuring Lactate Dehydrogenase (Promega). All propidium iodide incorporation assays were performed in triplicate wells. This protocol was adapted from previous work (Case et al., 2013).

### Western blotting

Macrophages were challenged with *L. pneumophila* as described (Asrat et al., 2014). At the desired time points, cells were lysed directly in 1X Laemmli Buffer with 5% β-mercaptoethanol, boiled for 10 min, and incubated on ice for 10 min prior to loading on SDS-PAGE gels and western blotting (Asrat et al., 2014). Primary antibodies used were anti-Caspase-11 clone 17D9 (Cell Signaling Technology #14340, 1:500), anti-GBP2 (Proteintech 11854-1-AP, 1:1000). Anti-phospho-STAT1(Tyr701) (58D6), anti-total STAT1,

and anti-GAPDH were obtained from Cell Signaling Technology. Western blots were imaged using the LI-COR Odyssey CLx or by chemiluminescent detection on film followed by analysis using LI-COR analysis software.

### IFN $\beta$ ELISA

A sandwich ELISA for IFN $\beta$  was used to measure supernatant IFN $\beta$  as International Units/ml as calculated based on a bioactive IFN $\beta$  recombinant protein standard, as previously described (Roberts et al., 2007; Rathinam et al., 2012). In brief, capture antibody (monoclonal rat anti-mouse IFN $\beta$ , Santa Cruz sc-57201) was applied at 4°C overnight in 0.1M carbonate buffer. Samples are incubated overnight and further antibody steps are diluted in 10% fetal calf serum in phosphate-buffered saline. Recombinant IFN $\beta$  (PBL 12400-1) was used for protein standard. Bound protein was detected using polyclonal rabbit anti-mouse IFN $\beta$  (R&D Systems, 32400-1). ELISA was developed using Goat anti-rabbit-HRP (Cell Signaling Technology 7074) in combination with TMB substrate (ThermoFisher N301), reaction stopped with 2N H<sub>2</sub>SO<sub>4</sub>.

### Quantitative RT-PCR

Cells were lysed with TRIzol (Thermo Fisher Scientific) and mRNA extracted by chloroform/isopropanol in accordance with TRIzol manufacturer's protocol. Quantitative PCR was performed with SYBR Green (Thermo Fisher Scientific) following cDNA generation by M-MuLV Reverse Transcriptase (NEB). Primers for Gbp genes were previously published (Kim et al., 2011). Primer sequences for *Casp11* were same as previously published (Kayagaki et al., 2011). Primers for mouse *Irf7*: (F) 5'-CTTCAGCACTTTCTTCC GAGA-3', (R) 5'-TGTAGTGTGGTGACCCTTGC-3'; *Isg15*: (F) 5'-GAGCTAGAGCCTGCAGCAAT-3', (R) 5'-TTCTGGGCAATCTGC TTCT-3', *Mx1*: (F) 5'-TCTGAGGAGAGCCAGACGAT-3', (R) 5'-ACTCTGGTCCCAATGACAG-3'; human *IRF7* (F) 5'-CTTGGCTC CTGAGAGGGCAG-3', (R) 5'-CGAAGTGCTTCCAGGGCA-3'; human *ISG15* (F) 5'-TCCTGCTGGTGGTGGACAA-3', (R) 5'-TTGTTAT TCCTACCAGGATGCT-3'; human *Mx1* (F) 5'-GTGCATTGCAGAAGGTCAGA-3', (R) 5'-TCAGGAGCCAGCTTAGGTGT-3'; human *GAPDH* (F) 5'-GCTCCTCTGTTTCGACAGTCA-3', (R) 5'-ACCTCCCATGGTGTCTGA-3'.

### Immunofluorescence microscopy for bacterial morphology

Both mouse and human cells were seeded at a density of 0.5x 10<sup>6</sup> cells per cm<sup>2</sup> on MatriPlate 0.17mm glass bottom plates (DOT Scientific) in RPMI containing 10% FBS. Cells were challenged with *L. pneumophila-GFP* at MOI = 10, in the presence of 0.1mg/mL thymidine and 2mM IPTG. Cultures were centrifuged at 1000rpm for 5 min, and at 1 hr post inoculation, extracellular bacteria were washed off with warm medium. At the desired time points, cells were washed, fixed with 2% paraformaldehyde and stained with polyclonal rabbit serum against *L. pneumophila* (1:5000), and detected with goat  $\alpha$ -rabbit IgG-Texas Red (1:500) (Life technologies). Bacteria that were antibody reactive were quantified from the GFP<sup>+</sup> pool and counted as having cytosolic-permeable vacuoles. For IFN-pretreated macrophages, a second round of probing with anti-*L. pneumophila* following 0.1% Triton X-100 permeabilization was performed to expose the total bacterial population, detected with goat  $\alpha$ -rabbit IgG-Alexa Fluor 488 (1:500) (Life technologies). Here, the total cytosolic permeable vacuoles was determined as the ratio of bacteria staining prior to permeabilization relative to the number of bacteria visualized after detergent permeabilization (Creasey and Isberg, 2012). Each experiment was a representative of at least 3 independent experiments. 3-4 technical replicates were performed per experiment, with 100+ bacteria viewed per technical replicate.

### Cytosolic plasmid extraction and quantification

For pJB908 plasmid extraction, the experimental protocol followed previous protocol (Ge et al., 2012). BMDM were seeded at 12x10<sup>6</sup> cells in a 10cm non-tissue culture treated dish with RPMI medium containing 10% FBS and 10% L929 cell supernatant to promote adherence. Cells were rested for 16 hr, then challenged with *L. pneumophila* harboring nontransferable pJB908 for the amount of time indicated in the text and figure legends. Cells were lifted passively after 10 min incubation with ice-cold PBS, washed twice with ice-cold PBS, and quantified by hemocytometer. Cells were lysed with 1.0x10<sup>7</sup> cells per mL of hypotonic buffer (20 mM HEPES-KOH [pH 7.5], 10 mM KCl, 1.5 mM MgCl<sub>2</sub>, 1 mM Na EDTA, 1 mM Na EGTA, and the Roche protease inhibitor cocktail) on ice for 15 min. The lysate was then passaged 15 times through a 20G needle attached to a 3ml syringe to complete the mechanical disruption. An unrelated plasmid pUC18 was spiked into the lysate at 100ng/ml after needle disruption to control for plasmid lost during the following extraction. Cellular debris, including the nuclear fraction and membrane vesicles, was removed by serial centrifugation at 5 min at 1500 g and 15 min at 5000 g. The cleared cytosolic lysate was then subjected to 2x phenol/chloroform extraction, 2x chloroform wash, followed by precipitation in 2.5x vol ethanol and chilled to -80°C. DNA was pelleted by centrifugation at 12,000 rpm for 30 min at 4°C. The precipitated DNA pellet was resuspended in 50  $\mu$ L of H<sub>2</sub>O then serially diluted for quantitative PCR with primer sets specific to pJB908. Standard curves with known amounts of plasmids were used to back-calculate the amount of plasmid contained in cytosolic fractions. Primer sets for pJB908 was published previously: (F) 5'-TCAGGAAGCACAAATGT CAATG-3'; (R) 5'-GGTCTACACCACCAAAATCACG-3' (Ge et al., 2012). Primers for pUC18 flanks the M13 cloning site of the vector. (F) 5'-CAGGAAACAGCTATGAC -3', (R) 5'-GTAAAACGACGGCCAG-3'.

### ASC speck quantification

Cells were seeded at a density of 0.5x 10<sup>6</sup> cells/cm<sup>2</sup> on MatriPlate 0.17mm glass bottom plates (DOT Scientific) in RPMI containing 10% FBS. At indicated time point post challenge with *L. pneumophila*, cells were fixed/permeabilized via ice cold methanol.

Polyclonal rat serum against *L. pneumophila* (1:5000) and rabbit anti-ASC antibody were used to recognize *L. pneumophila* and endogenous ASC. Goat anti-rat AF488 and goat anti-rabbit AF594 were used to visualize *L. pneumophila* and ASC, respectively. 25 fields at 20x magnification were captured and stitched by the Cytation3 automated microscope, generating fields of view with 3000 cells each for image quantification. Signal intensity of *L. pneumophila* and ASC were analyzed with the Gen5 software, using uninfected wells, and *Asc*<sup>-/-</sup> macrophages as negative controls to determine the appropriate signal intensity and puncta size. Puncta sizes less than 3  $\mu\text{m}$  were considered positive events.

### RNA-sequencing

Total RNA was isolated from uninfected mouse lungs using TRIzol and used to make a directional cDNA library using TrueSeq kit. cDNA libraries were sequenced on MiSeq (Illumina) and aligned using TopHat2 and Cufflinks software. Fragments per kilobases mapped was plotted in Prism7. Colors for data visualization is described in the text and figure legends. The data are available at the National Center for Biotechnology Information Gene Expression Omnibus: GSE110678

### QUANTIFICATION AND STATISTICAL ANALYSES

Statistical analyses on experiments using murine bone marrow derived macrophages were performed using the Student's t test (two-tailed) using GraphPad Prism7. Experiments involving human macrophages were analyzed using paired analysis, in which each pair consists of cells from the same donor. Bacterial colony forming units from mouse lungs were compared using log-transformed values. (\*)  $p < 0.05$ ; (\*\*)  $p < 0.01$ ; (\*\*\*)  $p < 0.001$ ; (\*\*\*\*)  $p < 0.0001$ .

### ACCESSION NUMBERS

The accession number for the RNA sequencing data reported in this paper is NCBI SRA: GSE110678.

**Cell Reports, Volume 24**

**Supplemental Information**

**Constitutive Interferon Maintains GBP Expression**

**Required for Release of Bacterial Components**

**Upstream of Pyroptosis and Anti-DNA Responses**

**Beiyun C. Liu, Joseph Sarhan, Alexander Panda, Hayley I. Muendlein, Vladimir Ilyukha, Jörn Coers, Masahiro Yamamoto, Ralph R. Isberg, and Alexander Poltorak**

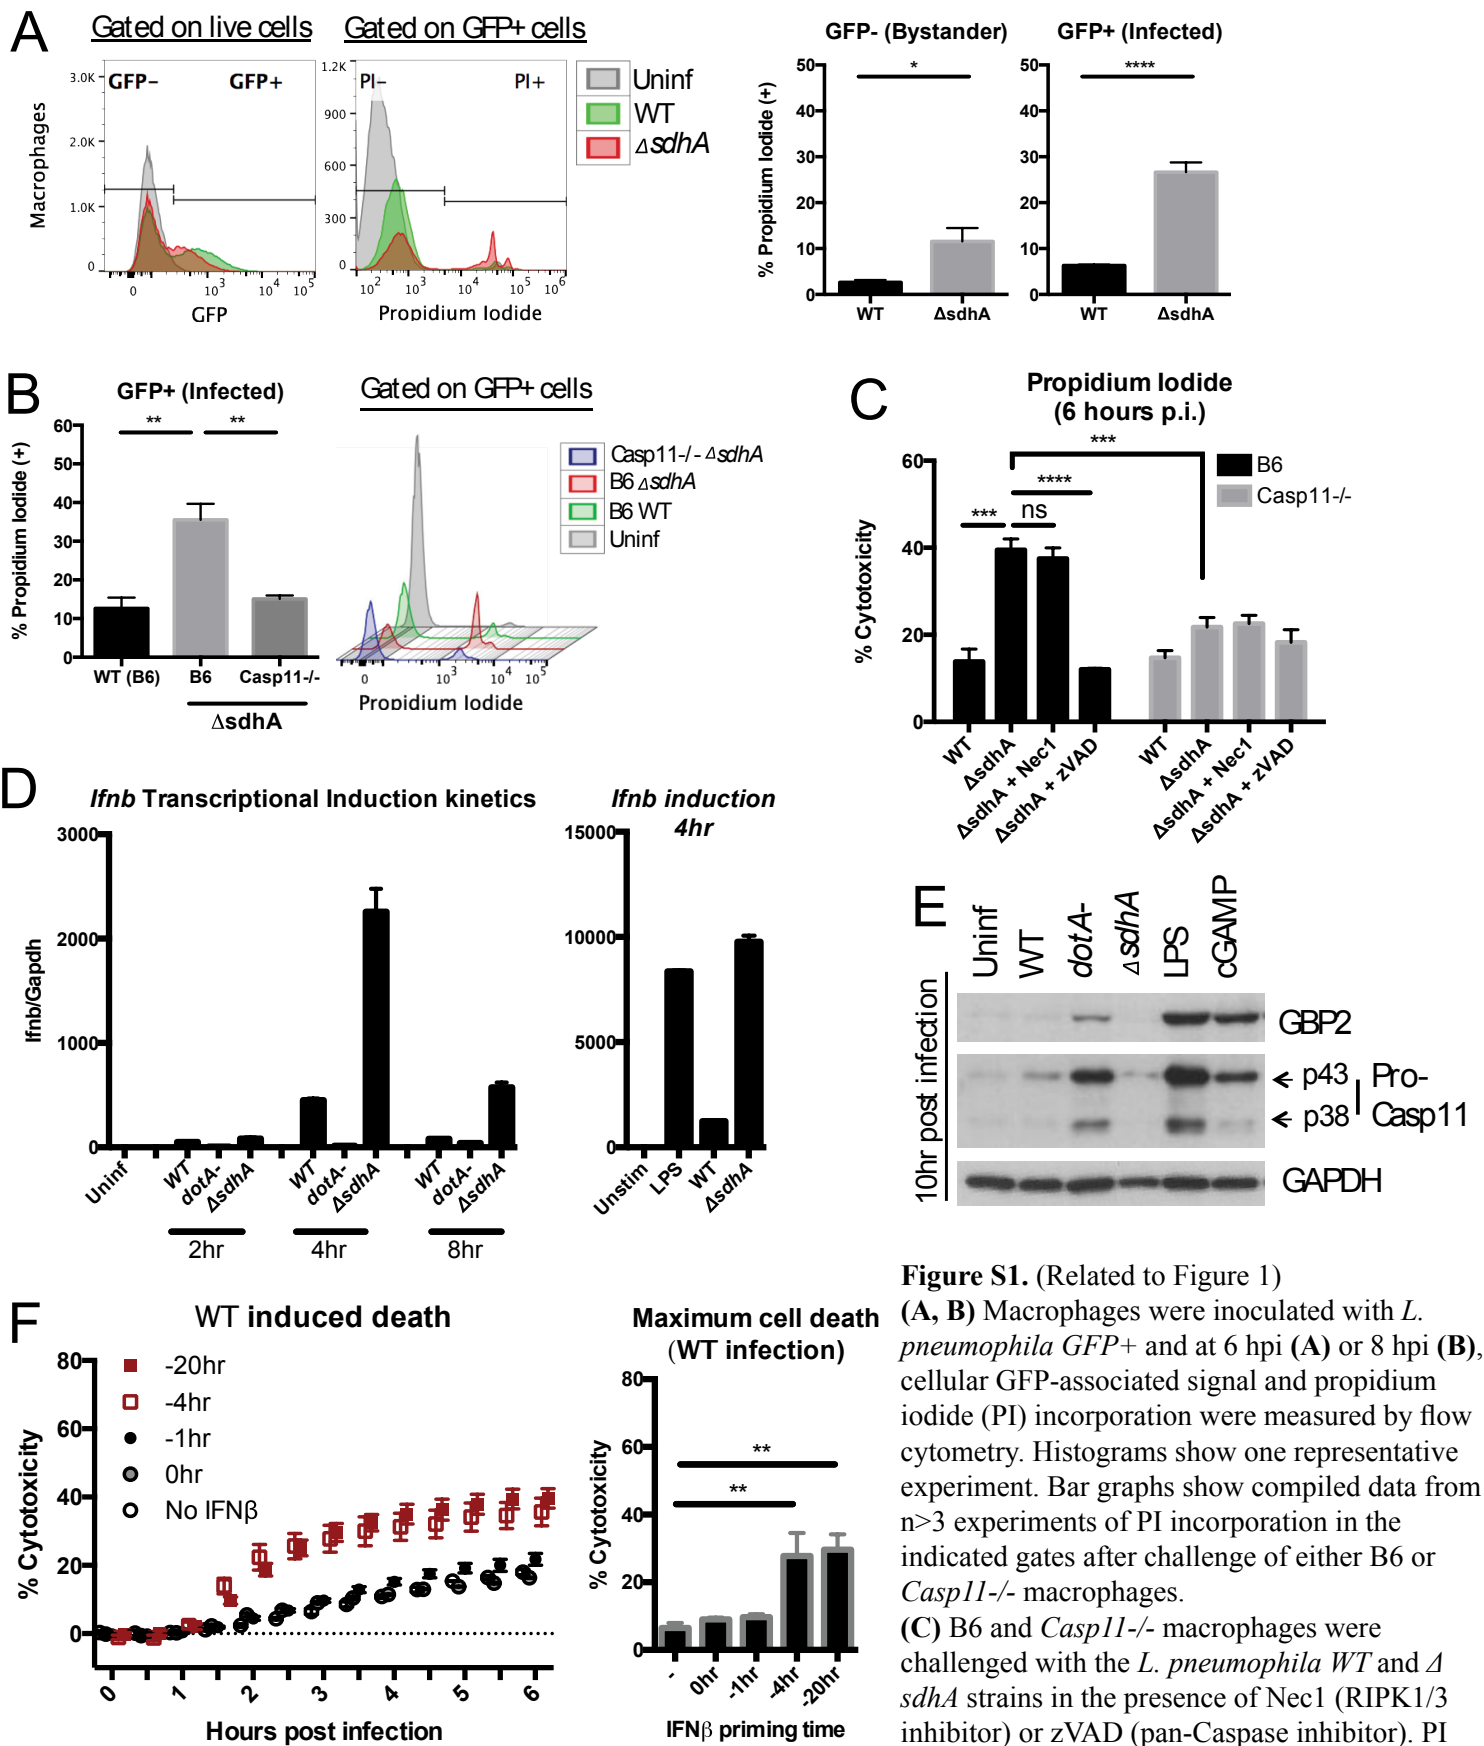

**Figure S1.** (Related to Figure 1)

(A, B) Macrophages were inoculated with *L. pneumophila* GFP+ and at 6 hpi (A) or 8 hpi (B), cellular GFP-associated signal and propidium iodide (PI) incorporation were measured by flow cytometry. Histograms show one representative experiment. Bar graphs show compiled data from  $n > 3$  experiments of PI incorporation in the indicated gates after challenge of either B6 or *Casp11*<sup>-/-</sup> macrophages.

(C) B6 and *Casp11*<sup>-/-</sup> macrophages were challenged with the *L. pneumophila* WT and  $\Delta$ sdhA strains in the presence of Nec1 (RIPK1/3 inhibitor) or zVAD (pan-Caspase inhibitor). PI incorporation at 6 hpi is show.

(D) B6 macrophages were challenged with WT, *dotA*- mutant, or  $\Delta$ sdhA mutants for the indicated times and *Ifnb* mRNA was measured by qRT-PCR.

(E) B6 macrophages were challenged with WT, *dotA*-, or  $\Delta$ sdhA strains for 10 hours. Whole cell lysates were probed by Western blot for Gbp2, pro-Casp11 and GAPDH. 10 hour LPS incubation and cGAMP transfection are displayed.

(F) B6 macrophages were pre-treated with 100U/ml of IFN $\beta$  at the indicated times points prior to, or concurrent with *L. pneumophila* WT challenge (see timeline in Fig 1G). Displayed is PI incorporation as a function of time (left), and maximum cell death measured at 6 hpi (right).

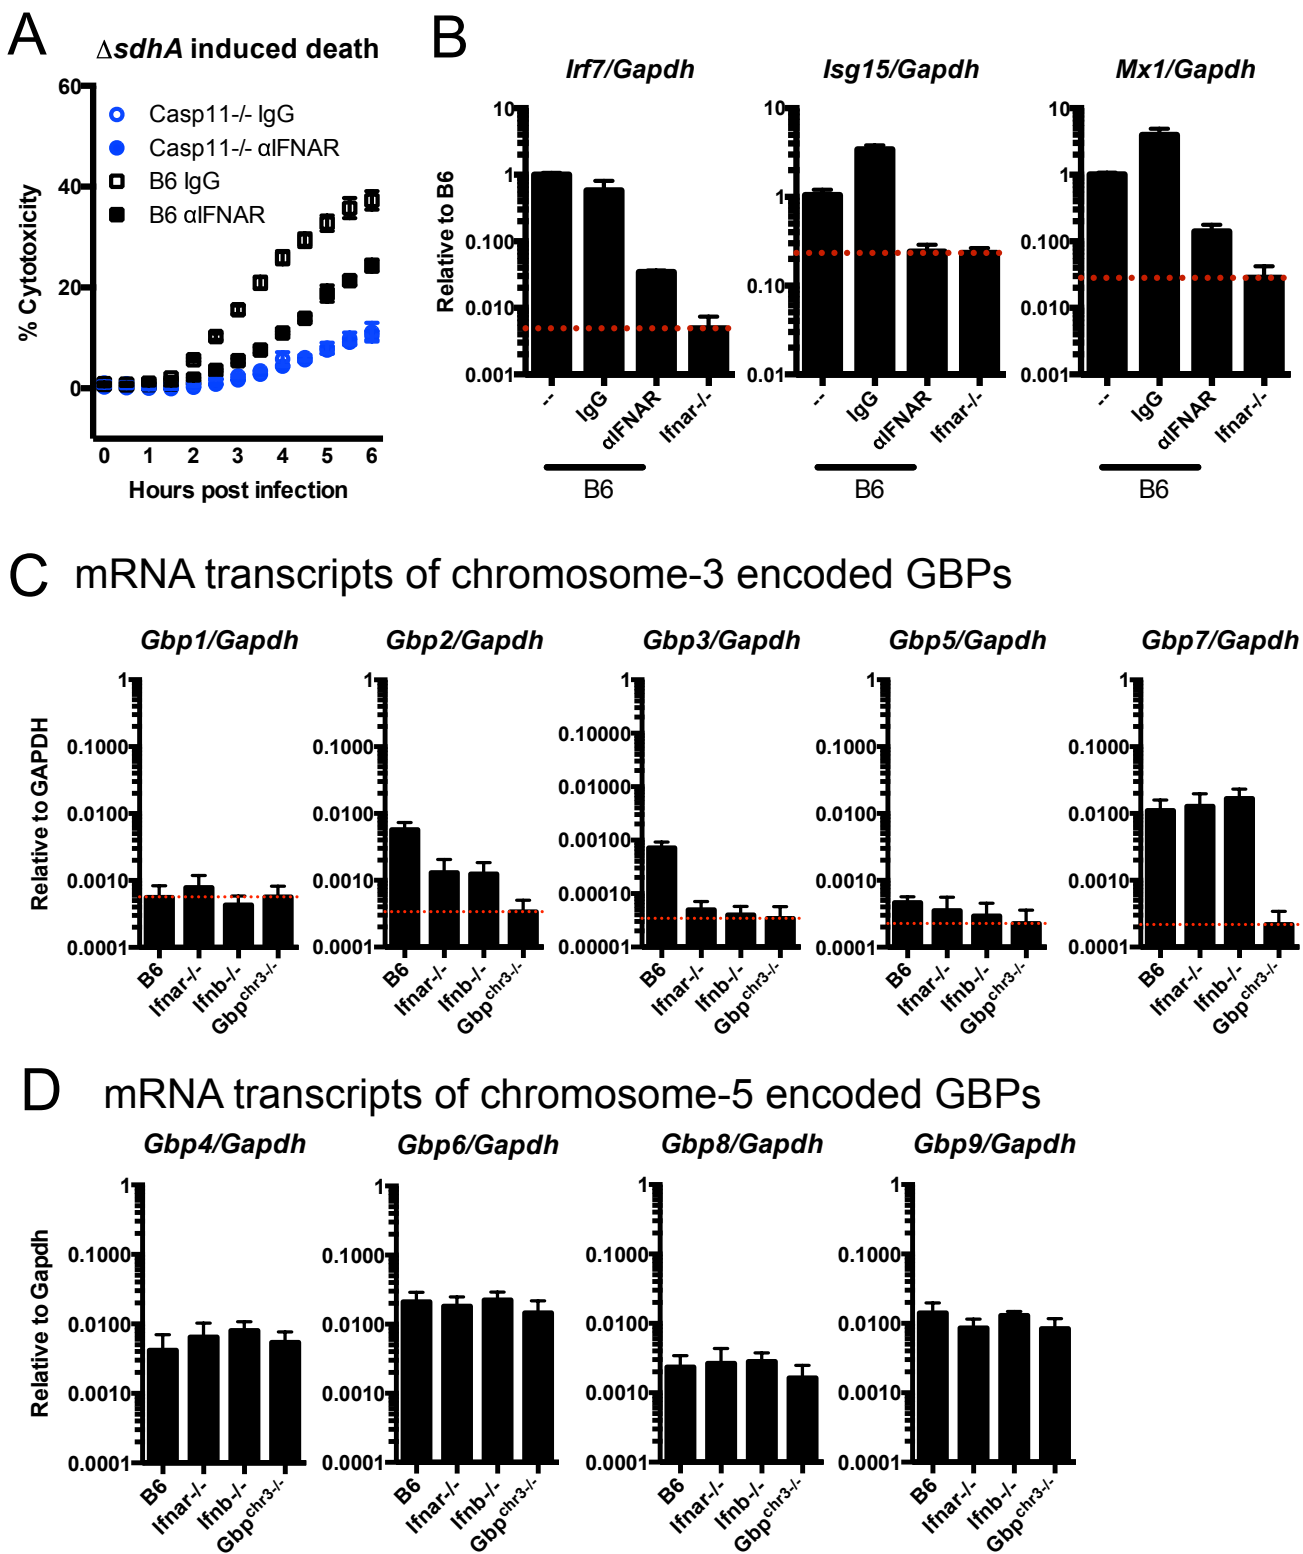

**Figure S2.** (Related to Figure 2)

(A) B6 and *Casp11*<sup>-/-</sup> Macrophages inoculated with *L. pneumophila*  $\Delta sdhA$  after 20 hr treatment with noted antibodies. PI incorporation used to measure cell death.

(B) qRT-PCR of *Irf7*, *Isg15*, *Mx1* expression in the presence or absence of constitutive IFN signaling.

(C, D) qRT-PCR showing the baseline expression of noted genes in macrophages from various mouse strains. The CT values of genes of interest are normalized to sample-intrinsic *Gapdh* CT values. Dotted red line indicates background amplification from knock-out macrophages.

# IFN rescue of baseline ISG expression

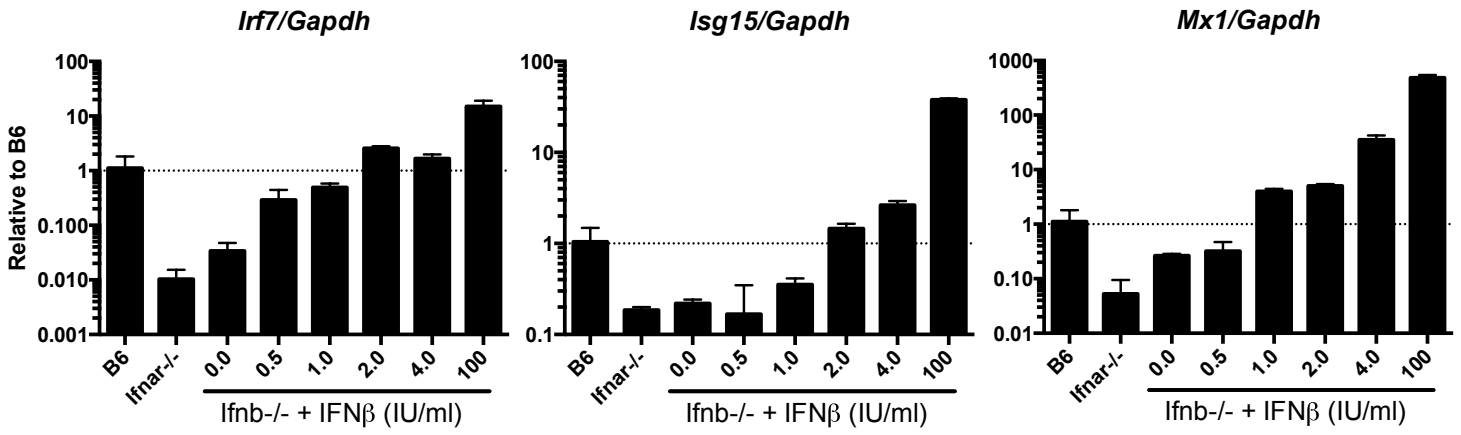

**Figure S3.** (Related to Figure 3)

*Ifnb*<sup>-/-</sup> macrophages were treated for 20 hours with various doses of recombinant IFNβ as in Fig 3B, C, D. Transcript levels were measured by qRT-PCR. Dotted black line indicates steady-state expression of genes of interest in B6 macrophages.



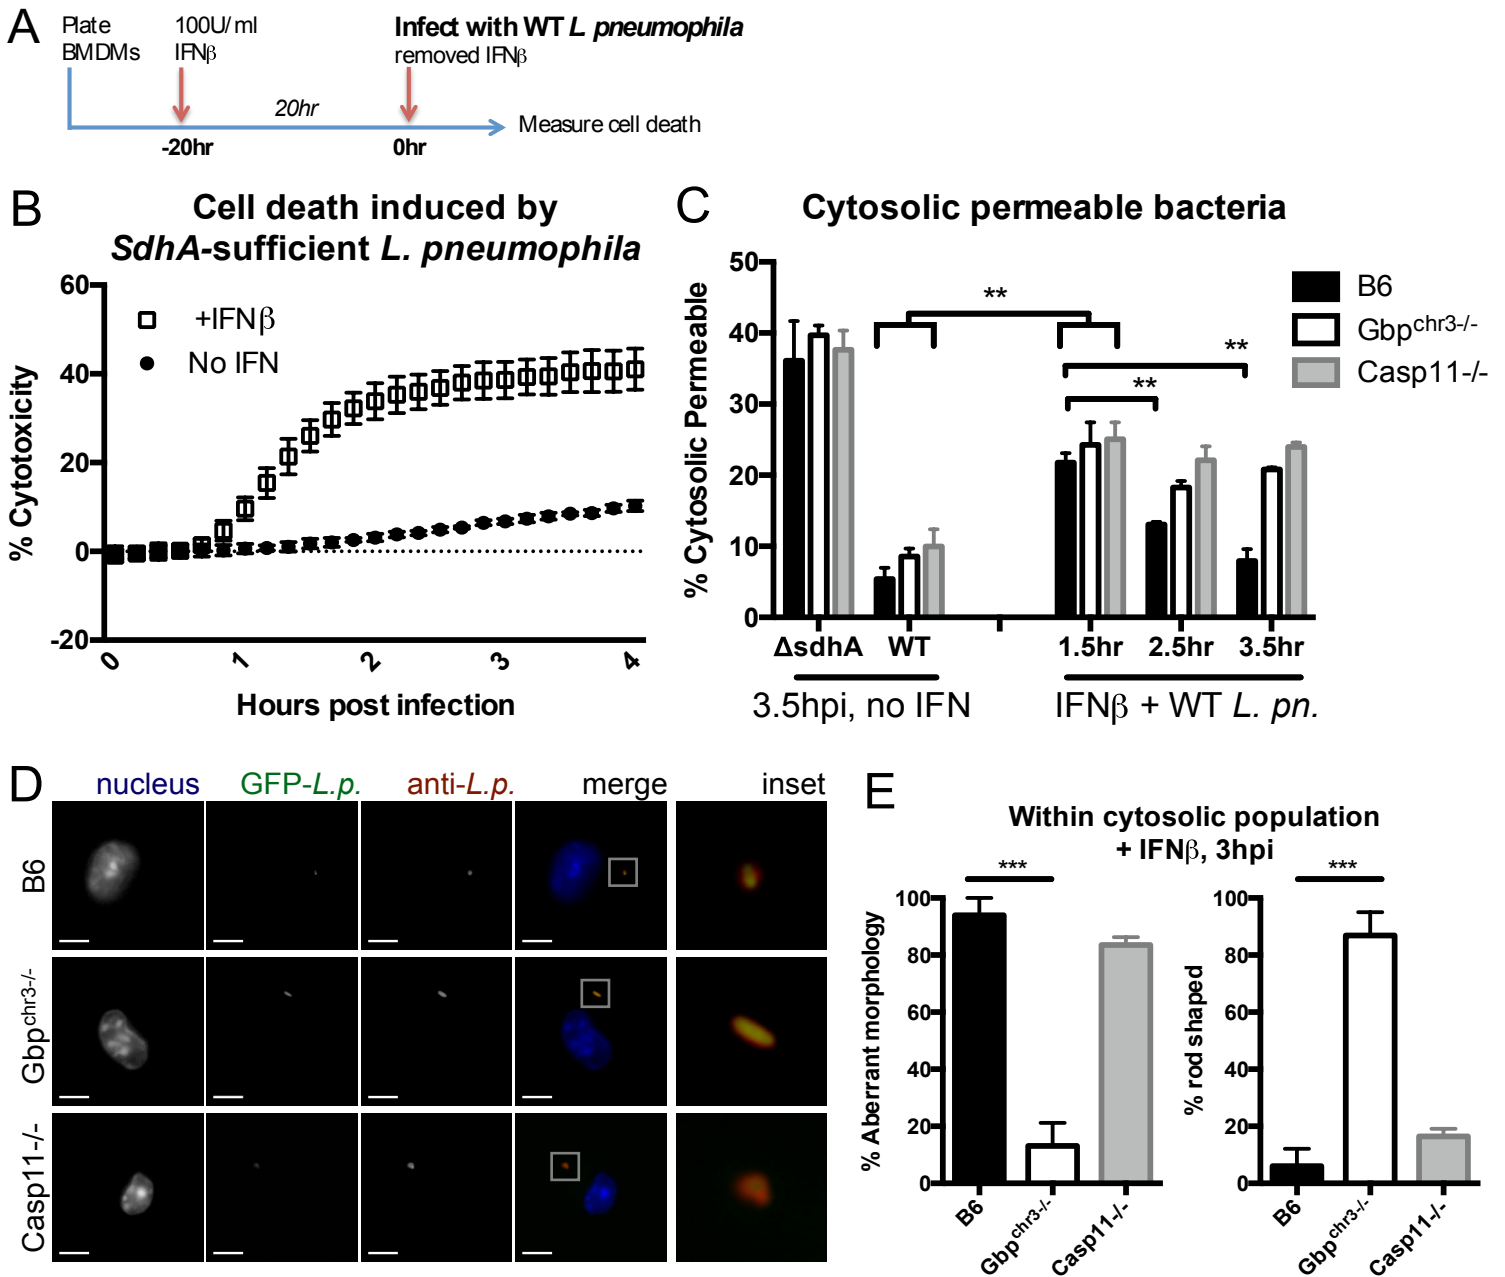

**Figure S4.** (Related to Figure 4)

- (A) Macrophages were pre-treated for 20 hrs with 100U/ml of IFN prior to inoculation with WT *L. pneumophila*.  
 (B) Kinetics of WT *L. pneumophila*-induced cell death in the absence and presence of IFN pre-activation.  
 (C) Percentage of cytosolic-accessible *L. pneumophila* based on antibody staining without detergent permeabilization.  
 (D) Representative images of cytosolic WT bacteria in noted macrophages at 3 hpi. Images were taken using 63x lens, scale bar = 5 $\mu$ m.  
 (E) Quantification of cytosolic accessible WT bacteria scored for aberrant (left) or rod-shaped (right) morphology at 3 hpi.

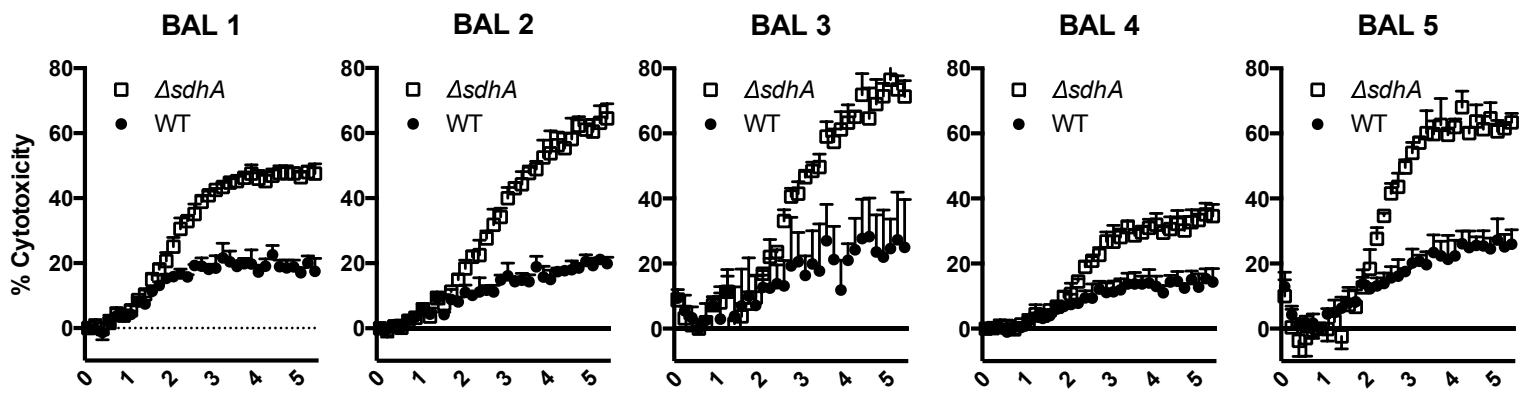

**Figure S5** (Related to Figure 5)

Individual kinetics of *ex vivo* human bronchoalveolar lavage (BAL) cells infected with *L. pneumophila* WT or  $\Delta sdhA$ , from 5 independent donors.

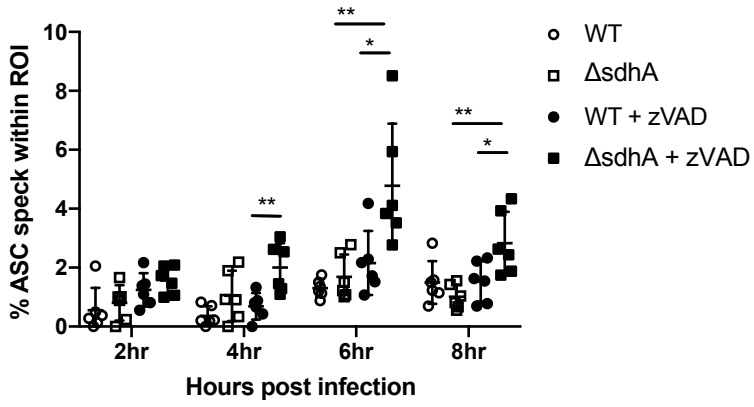

**Figure S6.** (Related to Figure 6)  
 B6 macrophages were challenged with the indicated strains of *L. pneumophila* in the presence of zVAD as indicated. ASC signal positivity is quantified within areas positive for anti-*Legionella* antibody (ROI).

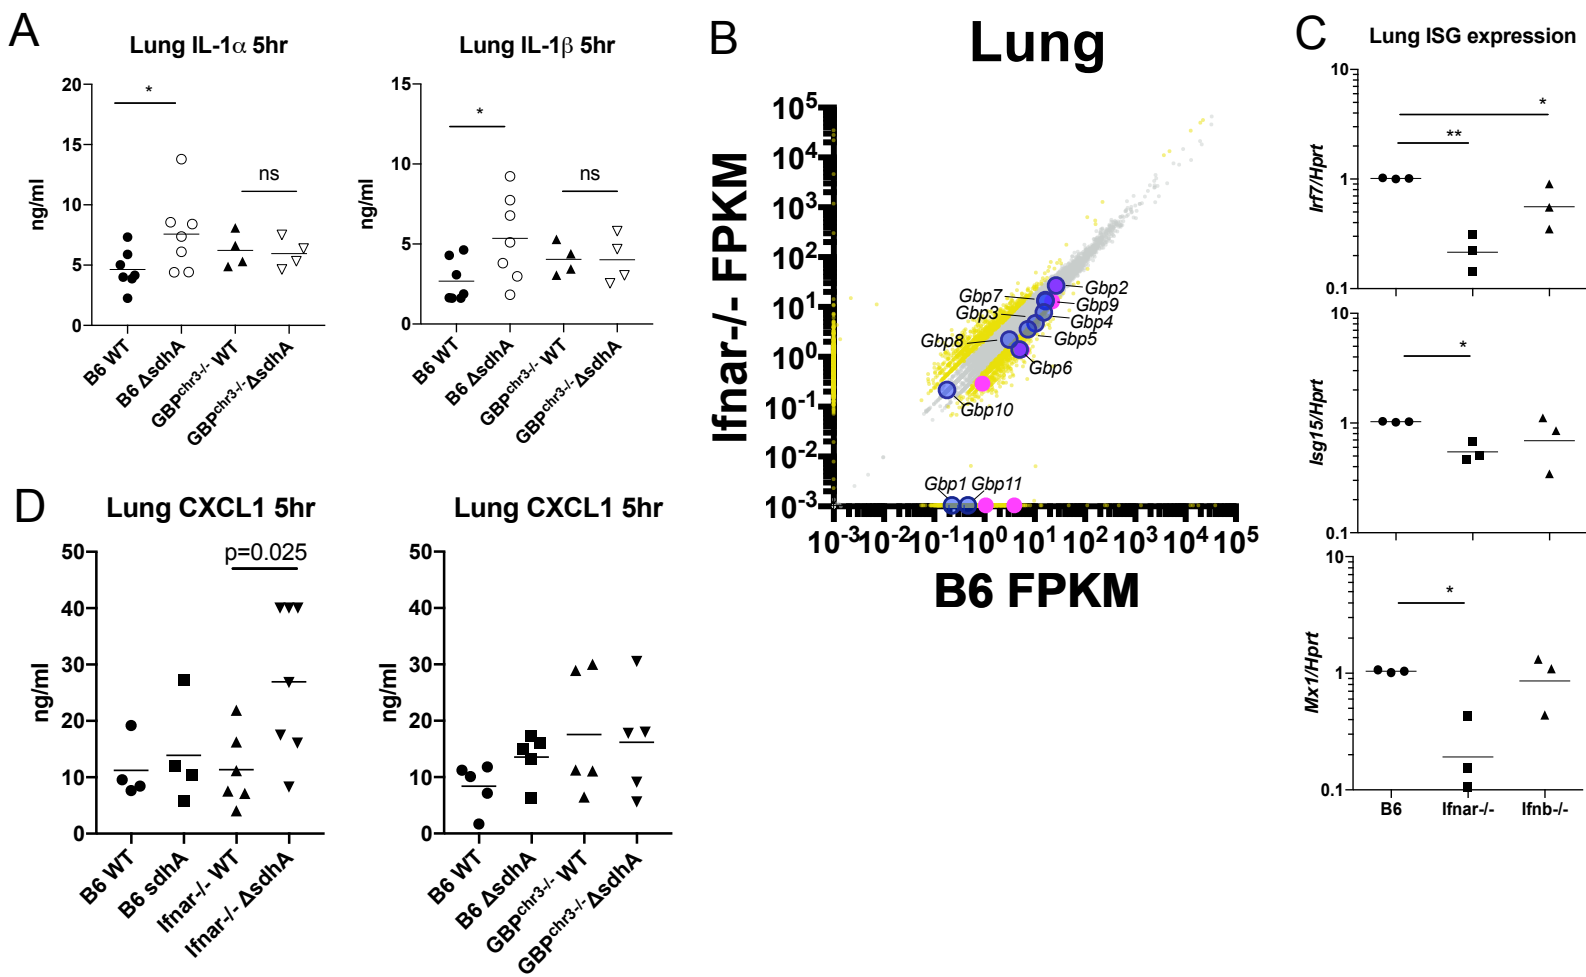

**Supporting Figure 7 (Related to Figure 7)**

- (A) Lung IL-1 $\alpha$  and IL-1 $\beta$  were measured by ELISA. Each dot represents an animal, results are pooled from 2 experiments in which tissues were harvested between 12 and 18hrs post infection.
- (B) Whole genome RNA-sequencing was performed on the indicated tissue and cellular populations. Fragments per kilobase mapped (FPKM) is plotted. Each dot is an individual gene. Gray dots represent genes where the expression difference between B6 and Ifnar $^{-/-}$  tissue is less than 2 fold. Yellow dots represent genes in which the expression difference between B6 and Ifnar $^{-/-}$  tissue is more than 2 fold. Blue dots represent the 11 Gbp genes encoded on the mouse genome, dots labeled. Magenta represent classical ISGs Stat1, Irf7, Isg15, Isg20, Mx1, Mx2.
- (C) Various ISGs expression levels measured by qPCR from uninfected lungs from B6, Ifnar $^{-/-}$  and Ifnb $^{-/-}$  animals. Each dot represents an animal.
- (D) Lung CXCL1 was measured by ELISA. Each dot represents an animal, results are pooled from 2 experiments in which tissues were harvested within a 4-6 hour window post infection.
